# Supplementary material for: miRNA Clusters with Up-Regulated Expression in Colorectal Cancer
Source: MDPI journal article supplement (doi:10.3390/cancers13122979), 2021-06-14
Supplement: s1 [file s1]

**Supplementary material S1: List of included studies for selection up-regulated miRNA clusters in CRC.**

1

| First author | Year | Ref.  | Country/<br>Region | Tumour<br>type | Control<br>samples | Method of<br>analysis | Upregulated<br>miRNAs | Normalization                          |
|--------------|------|-------|--------------------|----------------|--------------------|-----------------------|-----------------------|----------------------------------------|
| Motoyama     | 2009 | [270] | Japan              | CRC            | PAT                | microarray            | 21                    | RNU6-6P                                |
| Ng           | 2009 | [97]  | Hong Kong          | CRC            | PAT                | array                 | 14                    | RNU6-1                                 |
| Arndt        | 2009 | [271] | Australia          | CRC            | NT                 | array                 | 22                    | quantile normalization                 |
| Wang         | 2010 | [272] | China              | CC             | PAT                | microarray            | 12                    | RNU6-1                                 |
| Huang        | 2011 | [273] | Shangai            | CRC            | PAT                | microarray            | 26                    | RNU6-1                                 |
| Fu           | 2012 | [274] | China              | CRC            | PAT                | microarray            | 16                    | quantile scaling<br>algorithm          |
| Hamfjord     | 2012 | [275] | Norway             | CAD            | PAT                | sequencing            | 24                    | SNORD48                                |
| Chen         | 2012 | [276] | China              | CRC            | PAT                | array                 | 32                    | RNU6-6P                                |
| Li           | 2012 | [277] | China              | RC             | PAT                | miRNA chip            | 65                    | RNU6-6P                                |
| Mosakhani    | 2012 | [278] | Finland            | CRC            | NT                 | microarray            | 7                     | RNU6-1                                 |
| Nishida      | 2012 | [279] | Japan              | CRC            | NT                 | microarray            | 127                   | LOWESS method                          |
| Pizzini      | 2013 | [3]   | Italy              | CRC            | PAT                | microarray            | 29                    | SNORD44                                |
| Chen         | 2013 | [280] | Taiwan             | CRC            | PAT                | array                 | 5                     | RNU6-1                                 |
| Ak           | 2014 | [281] | Turkey             | CRC            | NT                 | qPCR                  | 1                     | SNORD 44, SNORD47,<br>SNORD 48         |
| Li           | 2014 | [282] | USA                | CRC            | PAT                | microarray            | 49                    | miR-191                                |
| Fukushima    | 2015 | [283] | Japan              | CRC            | PAT                | array                 | 5                     | RNU6-1                                 |
| Mo           | 2015 | [284] | Korea              | CRC            | PAT                | microarray            | 29                    | SNORD48, RNA5-8S5                      |
| Peng         | 2015 | [285] | China              | CRC            | PAT                | qPCR                  | 12                    | RNU6-1                                 |
| Rotelli      | 2015 | [114] | Italy              | CRC            | NT                 | qPCR                  | 11                    | RNU6-6P,<br>miR-16-3p                  |
| Tanoglu      | 2015 | [286] | Turkey             | CC             | PAT                | qPCR                  | 4                     | RNU6-6P                                |
| Vishnubalaji | 2015 | [2]   | Saudi Arabia       | CC             | PAT                | microarray            | 42                    | SNORD44, SNORD48                       |
| Wu           | 2015 | [287] | China              | CRC            | PAT                | qPCR                  | 3                     | RNU6-6P, SNORD44,<br>SNORD48, SNORD49A |
| Neerincx     | 2015 | [288] | Netherlands        | CRC            | NT                 | NGS                   | 121                   | edgeRs TMM method                      |
| Meng         | 2015 | [289] | China              | CRC            | PAT                | array                 | 11                    | NS                                     |
| Kara         | 2015 | [290] | Turkey             | CRC            | NT                 | array                 | 19                    | SNORD61, SNORD68,<br>SNORD72, SNORD95  |
| Chen         | 2015 | [263] | China              | CRC            | PAT                | qPCR                  | 4                     | RNU6-6P                                |
| Ozcan        | 2016 | [291] | Turkey             | CRC            | NT                 | array                 | 20                    | SNORD61, SNORD68,<br>SNORD96A, RNU6-2  |
| Pelossof     | 2016 | [292] | USA                | RC             | PAT                | sequencing            | 39                    | Quantile normalization                 |
| Sun          | 2016 | [293] | USA                | CRC            | PAT                | sequencing            | 12                    | SNORD47                                |
| Zekri        | 2016 | [294] | Egypt              | CRC            | NT                 | qPCR                  | 4                     | SNORD68                                |
| Li           | 2017 | [295] | China              | CRC            | PAT                | miRNA<br>microarray   | 17                    | RNU-6                                  |
| Nagy         | 2017 | [296] | Hungary            | CRC            | NT                 | microarray            | 6                     | Hsa-miR-423-5                          |
| Wu           | 2017 | [297] | -                  | CAD            | NT                 | sequencing            | 99                    | Log10                                  |

|               |      |       |                   |          |     |                  |     |                                           |
|---------------|------|-------|-------------------|----------|-----|------------------|-----|-------------------------------------------|
| Du            | 2018 | [298] | China             | CRC      | PAT | miRNA array      | 182 | RMA algorithm                             |
| Pellatt       | 2018 | [299] | USA               | CRC      | PAT | microarray       | 36  | Scaling factor based on median expression |
| Slattery      | 2018 | [140] | USA               | CRC      | NT  | microarray       | 22  | Scaling factor based on median expression |
| Wu            | 2018 | [255] | USA               | CRC      | NT  | miRNA sequencing | 34  | Localized smoothing algorithm             |
| Zhang         | 2018 | [300] | China             | CRC      | PAT | miRNA microarray | 1   | NS                                        |
| Brînzan       | 2019 | [301] | Romania           | CAD      | PAT | qPCR             | 5   | miR-26b, miR-92N                          |
| Li            | 2019 | [302] | China             | CRC, CAD | NT  | miRNA sequencing | 34  | NS                                        |
| Zhang         | 2019 | [303] | China             | CRC      | NT  | qPCR             | 4   | RNU6-6P                                   |
| Gungormez     | 2019 | [304] | Turkey            | CC       | PAT | array            | 3   | NS                                        |
| Hao           | 2019 | [305] | China, Italy, USA | CRC      | PAT | miRNA array      | 8   | RNU6-1                                    |
| Duran-Sanchon | 2020 | [119] | Spain             | CRC      | PAT | NGS              | 21  | Cyclic-loess method                       |
| Wei           | 2020 | [306] | China             | CC, RC   | PAT | miRNA microarray | 4   | RNU6-1                                    |
| Milanesi      | 2020 | [307] | Romania           | CRC      | NT  | array            | 1   | SNORD61, SNORD95, SNORD96A                |
| Zhou          | 2020 | [308] | China             | CRC      | NT  | qPCR             | 226 | RNU6-1                                    |

Tumour type – CRC (colorectal cancer); CAD (colorectal adenocarcinoma); RC (rectal cancer). miRNA expression in tumour in referred studies was compared to paired adjacent tissue (PAT) or to normal tissue (NT). Method of analysis – NGS – next gene sequencing; qPCR - quantitative real-time PCR. Normalization – NS – not specified; RNA5-8S5 - RNA, 5.8S ribosomal 5; RNU6-1 - RNA, U6 small nuclear 1; RNU6-2 - RNA, U6 small nuclear 2; RNU6-6P - RNA, U6 small nuclear 6, pseudogene; SNORD44 - small nucleolar RNA, C/D box 44; SNORD47 - small nucleolar RNA, C/D box 47; SNORD48 - small nucleolar RNA, C/D box 48; SNORD49A - small nucleolar RNA, C/D box 49A; SNORD61 - small nucleolar RNA, C/D box 61; SNORD68 - small nucleolar RNA, C/D box 68; SNORD72 - small nucleolar RNA, C/D box 72; SNORD95 - small nucleolar RNA, C/D box 95; SNORD96A - small nucleolar RNA, C/D box 96A. Ref. – reference.

2  
3  
4  
5  
6  
7  
8  
9  
10  
11

**Supplementary material S2: Up- or down-regulation of the analysed miRNA clusters levels in tumour tissue and circulation of patients with CRC**

| Cluster                                 | miRNA           | Expression in tumour tissue                                                                                                                         | Levels in serum                    | Levels in plasma               |
|-----------------------------------------|-----------------|-----------------------------------------------------------------------------------------------------------------------------------------------------|------------------------------------|--------------------------------|
| <i>miR-106a/18b/20b/19b-2/92a-2/363</i> | <b>miR-106a</b> | ↑ [3,96,277,281,284,286,293,298,308–311,97,312,114,130,131,134,158,255,271]                                                                         | ↑ [104,312]<br>↓ [313]             | ↑ [133]                        |
|                                         | <b>miR-18b</b>  | ↑ [2,3,298,309,314,270,272,273,277,279,282,295,296]                                                                                                 |                                    | ↑ [303]<br>↓ [314]             |
|                                         | <b>miR-20b</b>  | ↑ [2,3,140,279,284,299,309]<br>↓ [208,276,308,315]                                                                                                  |                                    | ↑ [316]                        |
|                                         | <b>miR-19b</b>  | ↑ [114,115,292,299,302,308,317,140,158,255,271,274,282,284,288]<br>↓ [318]                                                                          |                                    |                                |
|                                         | <b>miR-92a</b>  | ↑ [97,114,270,277,279,282,288,289,292,298,299,308,115,319–321,119,138–140,158,202,255]<br>↓ [318]                                                   | ↑ [129,136,154,322,323]<br>↓ [324] | ↑ [99,325,326]                 |
|                                         | <b>miR-363</b>  | ↓ [144,275,276,282,308,327]                                                                                                                         | ↓ [328]                            |                                |
| <i>miR-106b/93/25</i>                   | <b>miR-106b</b> | ↑ [2,3,284,288,292,298,299,302,308,329,330,97,119,255,271,272,274,277,279]<br>↓ [234,288,308,331,332]                                               | ↑ [330]                            | ↑ [325]                        |
|                                         | <b>miR-93</b>   | ↑ [140,202,308,333,271,274,279,282,284,288,289,298]<br>↓ [81,145,147,222]                                                                           | ↓ [324]                            |                                |
|                                         | <b>miR-25</b>   | ↑ [3,119,282,284,288,298,299,308,334,335,140,148,149,202,271,274,277,279]<br>↓ [336]                                                                | ↑ [335,337]<br>↓ [324]             |                                |
| <i>miR-17/18a/19a/20a/19b-1/92a-1</i>   | <b>miR-17</b>   | ↑ [2,3,270,271,273,274,276,277,279,282,284,288,97,289,290,292–294,298,299,303,308,309,114,314,334,338,339,115,119,140,158,202,255,263]<br>↓ [3,318] | ↑ [104,294]                        | ↑ [97,303,326]<br>↓ [314]      |
|                                         | <b>miR-18a</b>  | ↑ [2,3,270–273,277,279,280,282,288,292,57,296,298,302,303,309,323,338,97,114,115,117,119,153,255,305]<br>↓ [318,340]                                | ↑ [323]                            | ↑ [303,325]                    |
|                                         | <b>miR-19a</b>  | ↑ [2,3,277,279,284,288,291,292,294,302,308,309,114,341–343,115,132,255,271–274]<br>↓ [318]                                                          | ↑ [154,294,322,344–347]            |                                |
|                                         | <b>miR-20a</b>  | ↑ [2,3,140,155,158,270,272–274,277,279,282,29,284,288,289,291,292,299,308,309,314,323,65,338,348–351,97,114,115,119,130,134,305,263]<br>↓ [318]     | ↑ [294,323,344,350]<br>↓ [352]     | ↑ [133,185,325,348]<br>↓ [314] |
|                                         | <b>miR-19b</b>  | ↑ [2,114,299,302,308,317,115,140,158,255,274,279,284,292]<br>↓ [318]                                                                                | ↑ [104]                            |                                |
|                                         |                 |                                                                                                                                                     |                                    |                                |

12  
13

|                           |                 |                                                                                                                |                                             |                   |
|---------------------------|-----------------|----------------------------------------------------------------------------------------------------------------|---------------------------------------------|-------------------|
|                           | <b>miR-92a</b>  | ↑ [3,97,255,270,277,279,282,288,289,292,298,299,114, 308,319–321,115,119,138–140,158,202]<br>↓ [318]           | ↑ [129,136,154,322,323, 353]<br>↓ [324,354] | ↑ [97,99,325,326] |
| <i>miR-181a-1/181b-1</i>  | <b>miR-181a</b> | ↑ [29,158–160,279,291,308,355]<br>↓ [42,82]                                                                    | ↑ [104]                                     | ↑ [303]           |
| <i>miR-181a-2/181b-2</i>  | <b>miR-181b</b> | ↑ [134,171,271,279,291,298,308,356]<br>↓ [357]                                                                 | ↑ [358]<br>↓ [354]                          | ↑ [97]            |
| <i>miR-181c/181d</i>      | <b>miR-181c</b> | ↑ [279,282,284,288,289,291]                                                                                    |                                             | ↑ [97]            |
|                           | <b>miR-181d</b> | ↑ [3,34,298,359,158,161,270,277,279,288,291,292]                                                               |                                             | ↑ [97]            |
| <i>miR-183/ 96/182</i>    | <b>miR-183</b>  | ↑ [2,3,276,277,279,282,288,291,292,301,302,360,158, 361,362,162,164,202,255,270,271,273,305,263]               |                                             | ↑ [97]            |
|                           | <b>miR-96</b>   | ↑ [2,119,276,277,280,282,283,287,288,290,292,308,158, 309,323,363,165,220,255,271,273–275]                     | ↑ [323]                                     |                   |
|                           | <b>miR-182</b>  | ↑ [2,3,271,273,276,277,282,285,287–289,292,29,293, 298,301,308,364,365,100,119,158,168,169,255,270]<br>↓ [366] | ↑ [105]                                     | ↑ [100,185,367]   |
| <i>miR-191/ 425</i>       | <b>miR-191</b>  | ↑ [289,298,308,368,369]                                                                                        |                                             |                   |
|                           | <b>miR-425</b>  | ↑ [2,140,279,282,298,299,302,308,346,370]                                                                      | ↑ [337,346]                                 |                   |
| <i>miR-200c/ 141</i>      | <b>miR-200c</b> | ↑ [ 158,171,373,172,173,177,255,291,308,371,372]<br>↓ [348,374–376]                                            | ↑ [104,373,377]<br>↓ [378]                  | ↑ [97]<br>↓ [348] |
|                           | <b>miR-141</b>  | ↑ [114,177,379–381,255,277,282,285,289,301,308,371]<br>↓ [78,179,382]                                          | ↑ [377,383]<br>↓ [382]                      |                   |
| <i>miR-203a/203b</i>      | <b>miR-203</b>  | ↑ [130,158,271,277,282]                                                                                        | ↓ [354]                                     |                   |
|                           | <b>miR-203a</b> | ↑ [2,119,140,180,202,255,290,302,308,384]<br>↓ [58,181,238,385–387]                                            | ↑ [180,378]                                 | ↑ [97]            |
|                           | <b>miR-203b</b> | ↓ [72,308]                                                                                                     | ↓ [388]                                     |                   |
| <i>miR-222/ 221</i>       | <b>miR-222</b>  | ↑ [288–290,308]<br>↓ [376]                                                                                     |                                             | ↑ [97,103]        |
|                           | <b>miR-221</b>  | ↑ [2,97,292,299,302,308,117,119,140,198,273,276,279, 282]                                                      | ↑ [389,390]                                 | ↑ [103]           |
| <i>miR-23a/ 27a/ 24-2</i> | <b>miR-23a</b>  | ↑ [158,279,394,288,295,298,299,308,391–393]                                                                    | ↑ [358]<br>↓ [391,395]                      | ↑ [103]           |
|                           | <b>miR-27a</b>  | ↑ [158,184,298,394,396,186,274,275,277,284,290,292, 295]<br>↓ [376,397]                                        | ↑ [124]                                     | ↑ [103]           |
|                           | <b>miR-24</b>   | ↑ [119,158,277–279,292,299,308,394]<br>↓ [188,275,341]                                                         | ↓ [398]                                     | ↓ [399,400]       |
| <i>miR-29b-1/ 29a</i>     | <b>miR-29b</b>  | ↑ [3,29,302,140,158,271,274,277,282,290,295]<br>↓ [64,101,189,376,401]                                         | ↓ [402]                                     | ↓ [101]           |
|                           | <b>miR-29a</b>  | ↑ [192,271,277,284,290,292,323,403]<br>↓ [404]                                                                 | ↑ [323,345,405]<br>↓ [389]                  | ↑ [99,325]        |
| <i>miR-301b/ 130b</i>     | <b>miR-301b</b> | ↑ [272,275,288,308]                                                                                            |                                             |                   |

|                      |                 |                                                      |         |
|----------------------|-----------------|------------------------------------------------------|---------|
| <i>miR-452/ -224</i> | <b>miR-130b</b> | ↑[2,119,308,406,194,271,279,282,285,292,298,299]     | ↑ [337] |
|                      | <b>miR-452</b>  | ↑ [158,195,255,276,277,279,284,288,308]              | ↓ [388] |
|                      |                 | ↓ [196]                                              |         |
|                      | <b>miR-224</b>  | ↑[2,3,273,274,279,282–284,288,292,293,298,97,305,308 | ↑ [104] |
|                      |                 | ,323,407–409,197,198,233,255,270–272]                | ↓ [388] |
|                      |                 | ↓ [410]                                              |         |

14

15

**Supplementary material S3: Analysis of miRNA expression with clinicopathological characteristics.**

16

| cluster                                              | miRNA           | advanced TNM stage                    | Presence of metastasis                                  |
|------------------------------------------------------|-----------------|---------------------------------------|---------------------------------------------------------|
| <i>miR-106a/18b/20b/19b-2/92a-2/363</i>              | <i>miR-106a</i> |                                       | ↑ TU [411]                                              |
|                                                      | <i>miR-18b</i>  |                                       | ↑ TU [295]                                              |
|                                                      | <i>miR-363</i>  | ↓ S [328]                             | ↓ S [328]<br>↓ TU [144,327]                             |
|                                                      | <i>miR-106b</i> | ↑ S [330]                             | ↓ TU [74,234,332]                                       |
| <i>miR-106b/93/25</i>                                | <i>miR-93</i>   |                                       | ↑ TU [145]                                              |
|                                                      | <i>miR-25</i>   | ↑ TU [148]                            | ↑ TU [148]; S [335,337]                                 |
|                                                      | <i>miR-17</i>   |                                       | ↑ M [412]; P [326]; TU [321]<br>↓ TU [413]              |
| <i>miR-17/18a/19a/20a/19b-1/92a-1</i>                | <i>miR-18a</i>  |                                       | ↑ S [390]                                               |
|                                                      | <i>miR-19a</i>  | ↑ S [344]; TU [342]                   | ↑ TU [236,342] S [343,344]<br>↓ P [414]                 |
|                                                      | <i>miR-20a</i>  | ↑ S [344]; TU [415]                   | ↑ S [344]; TU [155,415]                                 |
|                                                      | <i>miR-19b</i>  |                                       | ↑ M [156]; TU [317]                                     |
|                                                      | <i>miR-92a</i>  | ↑ TU [137,138]<br>↑ S [353]           | ↑ TU [137,139,279,319,321,416]; P [326];<br>S [319,353] |
|                                                      | <i>miR-181a</i> | ↑ TU [159]                            | ↑ TU [160,176]                                          |
| <i>miR-181a-1/181b-1</i><br><i>miR-181a-2/181b-2</i> | <i>miR-181a</i> |                                       |                                                         |
| <i>miR-181c/181d</i>                                 | <i>miR-181d</i> |                                       | ↑ TU [34]                                               |
| <i>miR-183/96/182</i>                                | <i>miR-183</i>  | ↑ TU [162,370]; P [360]               | ↑ TU [162]; P [360]                                     |
|                                                      | <i>miR-96</i>   | ↑ TU [165]                            | ↑ TU [165]                                              |
|                                                      | <i>miR-182</i>  | ↑ TU [169,196,301]                    | ↑ TU [168,169,176]                                      |
| <i>miR-191/425</i>                                   | <i>miR-191</i>  | ↑ TU [417]                            | ↑ TU [417]<br>↓ TU [170]                                |
|                                                      | <i>miR-425</i>  |                                       | ↑ S [337]                                               |
| <i>miR-200c/141</i>                                  | <i>miR-200c</i> | ↑ TU [177,373]; S [173]<br>↓ TU [418] | ↑ TU [173,373,419]; S [173,371]<br>↓ TU [176,418,420]   |
|                                                      | <i>miR-141</i>  | ↑ TU [177]; P [166,178]<br>↓ TU [179] | ↑ TU [36]; S [371,421]<br>↓ TU [179]                    |
|                                                      | <i>miR-203a</i> | ↑ S [180]<br>↓ TU [422]               | ↑ S [180]<br>↓ TU [181,386]                             |
|                                                      | <i>miR-221</i>  | ↓ TU [182]                            | ↓ TU [182]                                              |
| <i>miR-23a/27a/24-2</i>                              | <i>miR-23a</i>  | ↑ BL [391]                            |                                                         |
|                                                      | <i>miR-27a</i>  | ↑ TU [186]                            | ↑ TU [183,184,423]; P [185]                             |
|                                                      | <i>miR-24</i>   | ↓ TU [188,341]                        | ↓ TU [188,341]                                          |
| <i>miR-29b/ 29a</i>                                  | <i>miR-29b</i>  | ↓ S [402]                             |                                                         |
|                                                      | <i>miR-29a</i>  | ↑ S [424]<br>↓ TU [64]                | ↑ TU [190,425]<br>↑ S [190]<br>↓ TU [64,176,401]        |

|                              |                 |                              |
|------------------------------|-----------------|------------------------------|
| <b><i>miR-301b/ 130b</i></b> | <b>miR-130b</b> | ↑ TU [194]                   |
|                              | <b>miR-224</b>  | ↑ LM [407,409]; TU [198,408] |
|                              |                 | ↓ TU [182]                   |
|                              |                 | ↓ LNM [409]; TU [182]        |

↑ depicts increased expression/levels associated with advanced TNM stage or metastasis, respectively ↓ decreased expression/levels.  
 Source for measurement of miRNA expression is bolded – TU (tumor tissue); P (plasma); S (serum); LM (liver metastasis); BL (blood); LNM (lymph node metastases); M - metastasis

17

18

19

20

21

22

**Supplementary material S4: Alphabetical list of target genes of up-regulated miRNA clusters.**

| Gene symbol | Gene name                                            | Function | miRNA                    | Cluster                      | Reference |
|-------------|------------------------------------------------------|----------|--------------------------|------------------------------|-----------|
| ABCA1       | ATP binding cassette subfamily A member 1            | TS       | miR-183-5p               | miR-183/96/182               | [426]     |
| ABCF1       | ATP-binding cassette, subfamily F, member 1          | TS       | miR-23a-3p               | miR-23a/27a/24-2             | [427]     |
| ADAM9       | ADAM metalloproteinase domain 9                      | O        | miR-20b-5p               | miR-106a/363                 | [208]     |
| AFDN        | Afadin, Adherens junction formation factor           | TS       | miR-183-3p               | miR-183/96/182               | [428]     |
| AGER        | Advanced glycosylation end-product specific receptor | TS       | miR-182                  | miR-183/96/182               | [48]      |
| AKAP12      | A kinase anchor protein 12                           | TS       | miR-183-5p               | miR-183/96/182               | [370]     |
| AKT2        | AKT serine/threonine kinase 2                        | O        | miR-203a-3p              | miR-203a/203b                | [429]     |
| AMER1       | APC membrane recruitment protein 1                   | TS       | miR-20a                  | miR-17/92a-1                 | [310]     |
|             |                                                      |          | miR-106a-5p              | miR-106a/363                 | [310]     |
| ANGPTL8     | Angiopoietin like 8                                  | O        | miR-25                   | miR-106b/25/93               | [430]     |
| APAF1       | Apoptotic peptidase activating factor 1              | TS       | miR-23a-3p               | miR-23a/27a/24-2             | [392]     |
| AQP8        | Aquaporin 8                                          | TS       | miR-92a-5p               | miR-106a/363<br>miR-17/92a-1 | [431]     |
| ARID4B      | AT-rich interaction domain 4B                        | TS       | miR-93-3p                | miR-106b/25/93               | [55]      |
| ATG12       | Autophagy related 12                                 | O        | miR-93-5p                | miR-106b/25/93               | [66]      |
| ATG16L1     | Autophagy Related 16 Like 1                          | TS       | miR-106b-5p<br>miR-93-5p | miR-106b/25/93               | [432]     |
|             |                                                      |          | miR-20a-5p               | miR-17/92a-1                 | [433]     |
| ATG5        | Autophagy related 5                                  | TS       | miR-183-5p               | miR-183/96/182               | [164]     |
| ATG7        | Autophagy related 7                                  | TS       | miR-106a-5p              | miR-106a/363                 | [131]     |
| ATM         | ATM serine/threonine kinase                          | TS       | miR-18a-5p               | miR-17/92a-1                 | [153]     |
|             |                                                      |          | miR-203a-3p              | miR-203a/203b                | [232]     |
| ATXN3       | Ataxin 3                                             | TS       | miR-25-3p                | miR-106b/25/93               | [149]     |
| BCL2L1      | BCL2 like 1                                          | O        | miR-203b-3p              | miR-203a/203b                | [72]      |
| BCL2L11     | BCL2 like 11                                         | TS       | miR-92a-3p               | miR-106a/363<br>miR-17/92a-1 | [434]     |
| BCL9L       | BCL9 like                                            | O        | miR-29b-3p               | miR-29b-1/29a                | [435]     |
| BID         | BH3 interacting domain death agonist                 | TS       | miR-20a-5p               | miR-17/92a-1                 | [350]     |
| BMI1        | BMI1 proto-oncogene, polycomb ring finger            | O        | miR-200c-3p              | miR-200c/141                 | [241]     |
| BNIP2       | BCL2 interacting protein 2                           | TS       | miR-20a-5p               | miR-17/92a-1                 | [436]     |
| BTG1        | BTG anti-proliferation factor 1                      | TS       | miR-27a-3p               | miR-23a/27a/24-2             | [437]     |
| BTG3        | BTG anti-proliferation factor 3                      | TS       | miR-17-5p                | miR-17/92a-1                 | [68]      |
| CEBPB       | CCAAT enhancer binding protein beta                  | TS       | miR-191-5p               | miR-191/425                  | [369]     |



|        |                                                  |    |             |                                        |           |
|--------|--------------------------------------------------|----|-------------|----------------------------------------|-----------|
| CALR   | Calreticulin                                     | TS | miR-27a-3p  | miR-23a/27a/24-2                       | [438]     |
|        |                                                  |    | miR-93-5p   | miR-106b/25/93                         | [222]     |
| CCND1  | Cyclin D1                                        | O  | miR-18a-5p  | miR-17/92a-1                           | [224]     |
|        |                                                  |    | miR-96-5p   | miR-183/96/182                         | [167]     |
| CCND2  | Cyclin D2                                        | O  | miR-141-3p  | miR-200c/141                           | [375]     |
| CD274  | CD274 molecule                                   | O  | miR-93-5p   | miR-106b/25/93                         | [147]     |
| CDC42  | Cell division cycle 42                           | O  | miR-18a-5p  | miR-17/92a-1                           | [224]     |
| CDH1   | Cadherin 1                                       | TS | miR-224-5p  | miR-452/224                            | [198]     |
| CDK19  | Cyclin dependent kinase 19                       | O  | miR-18a-5p  | miR-17/92a-1                           | [439]     |
| CDK2   | Cyclin Dependent Kinase 2                        | O  | miR-200c-3p | miR-200c/141                           | [43]      |
|        |                                                  |    | miR-106b-5p | miR-106b/25/93                         | [234]     |
| CDKN1A | Cyclin dependent kinase inhibitor 1A             | TS | miR-20a-5p  | miR-17/92a-1                           | [235]     |
|        |                                                  |    | miR-224-5p  | miR-452/224                            | [233]     |
| CDKN2B | Cyclin dependent kinase inhibitor 2B             | TS | miR-18b-5p  | miR-106a/363                           | [295]     |
| CDS2   | CDP-diacylglycerol synthase 2                    | O  | miR-224-5p  | miR-452/224                            | [440]     |
| CLU    | Clusterin                                        | TS | miR-17      | miR-17/92a-1                           | [33]      |
| CPEB4  | Cytoplasmic polyadenylation element-binding 4    | O  | miR-203a-3p | miR-203a/203b                          | [226]     |
| CREB1  | cAMP responsive element binding protein 1        | O  | miR-203a-3p | miR-203a/203b                          | [54]      |
| CRY2   | Cryptochrome circadian regulator 2               | TS | miR-181d-5p | miR-181c/181d                          | [34]      |
| CSE1L  | Chromosomal segregation 1 like                   | O  | miR-203a-3p | miR-203a/203b                          | [49]      |
|        |                                                  |    | miR-93-5p   | miR-106b/25/93                         | [222]     |
| CTNNB1 | Catenin Beta 1                                   | O  | miR-181a-5p | miR-181a-1/181b-1<br>miR-181a-2/181b-2 | [56]      |
|        |                                                  |    | miR-203a-3p | miR-203a/203b                          | [67]      |
|        |                                                  |    | miR-24-5p   | miR-23a/27a/24-2                       | [441]     |
| CTNND1 | Catenin delta 1                                  | TS | miR-425-5p  | miR-191/425                            | [442]     |
| CTSA   | Cathepsin A                                      | O  | miR-106b-5p | miR-106b/25/93                         | [332]     |
| CXCL8  | C-X-C motif chemokine ligand 8                   | O  | miR-20a-5p  | miR-17/92a-1                           | [443]     |
| CYP7B1 | Cytochrome P450, family 7, subfamily B, member 1 | O  | miR-17-5p   | miR-17/92a-1                           | [368]     |
| DAB2IP | DAB2 interacting protein                         | TS | miR-182-5p  | miR-183/96/182                         | [105]     |
| DHFR   | Dihydrofolate reductase                          | O  | miR-24-3p   | miR-23a/27a/24-2                       | [444]     |
| DKK3   | Dickkopf WNT signalling pathway inhibitor 3      | TS | miR-92a-3p  | miR-106a/363<br>miR-17/92a-1           | [210]     |
|        |                                                  |    | miR-106b-5p | miR-106b/25/93                         | [329,330] |
| DLC1   | DLC1 Rho GTPase activating protein               | TS | miR-106b-3p |                                        |           |
|        |                                                  |    | miR-141-3p  | miR-200c/141                           | [381]     |
| DND1   | DND microRNA-mediated repression inhibitor 1     | O  | miR-24-3p   | miR-23a/27a/24-2                       | [445]     |
| DNMT3B | DNA methyltransferase 3 beta                     | O  | miR-203a-3p | miR-203a/203b                          | [385]     |

|         |                                                           |    |                           |                                        |           |
|---------|-----------------------------------------------------------|----|---------------------------|----------------------------------------|-----------|
| DUSP2   | Dual-specificity phosphatase 2                            | TS | miR-106a-5p               | miR-106a/363                           | [311]     |
| E2F5    | E2F transcription factor 5                                | O  | miR-181a-5p               | miR-181a-1/181b-1<br>miR-181a-2/181b-2 | [446]     |
| EGFR    | Epidermal growth factor receptor                          | O  | miR-141-3p                | miR-200c/141                           | [447]]    |
| EIF5A2  | Eukaryotic initiation factor 5A2                          | O  | miR-203a-3p               | miR-203a/203b                          | [181]     |
| ETS1    | ETS proto-oncogene 1, transcription Factor                | O  | miR-200c-3p               | miR-200c/141                           | [36]      |
| EZH2    | Enhancer of zeste 2 polycomb repressive complex 2 subunit | O  | miR-363-3p                | miR-106a/363                           | [73]]     |
| F2RL3   | F2R like thrombin or trypsin receptor 3                   | TS | miR-17-3p                 | miR-17/92a-1                           | [339]     |
| FAM172A | Family with sequence similarity 172 member A              | TS | miR-27a-3p                | miR-23a/27a/24-2                       | [186]     |
| FBXL3   | F-box and leucine rich repeat protein 3                   | TS | miR-181d-5p               | miR-181c/181d                          | [34]      |
| FBXW7   | F-Box and WD repeat domain containing 7                   | TS | miR-92a-3p                | miR-106a/363<br>miR-17/92a-1           | [319]     |
|         |                                                           |    | miR-182-5p                | miR-183/96/182                         | [448]     |
| FLT1    | Fms related receptor tyrosine kinase 1                    | O  | miR-200c-3p               | miR-200c/141                           | [36]      |
| FOXA1   | Forkhead box A1                                           | TS | miR-93-5p                 | miR-106b/25/93                         | [333]]    |
| FOXF2   | Forkhead box F2                                           | TS | miR-19a-3p                | miR-17/92a-1                           | [347]     |
|         |                                                           |    | miR-182-5p                | miR-183/96/182                         | [449]     |
| FOXJ2   | Forkhead Box J2                                           | O  | miR-20a-5p                | miR-17/92a-1                           | [450]     |
| FOXO1   | Forkhead box protein O1                                   | TS | miR-96-5p<br>miR-182-5p   | miR-183/96/182                         | [220]     |
| FOXO3a  | Forkhead box protein O3a                                  | TS | miR-96-5p<br>miR-182-5p   | miR-183/96/182                         | [62,220]  |
| FOXQ1   | Forkhead box Q1                                           | O  | miR-106a-5p               | miR-106a/363                           | [451]     |
| GABBR1  | Gamma-amino-butyric acid type B receptor 1                | TS | miR-106a-5p<br>miR-20b-5p | miR-106a/363                           | [452]     |
|         |                                                           |    | miR-106b-5p               | miR-106b/25/93                         | [452]     |
|         |                                                           |    | miR-20a-5p<br>miR-17-5p   | miR-17/92a-1                           | [452]     |
| GATA6   | GATA Binding Protein 6                                    | O  | mi-363-3p                 | miR-106a/363                           | [38]      |
|         |                                                           |    | miR-203a-3p               | miR-203a/203b                          | [453]     |
| GEMIN2  | Gem nuclear organelle associated protein 2                | O  | miR-141-3p                | miR-200c/141                           | [454]     |
| GPC1    | Glypican-1                                                | O  | miR-96-5p                 | miR-183/96/182                         | [262]     |
| GRN     | Granulin precursor                                        | O  | miR-29b-3p                | miR-29b-1/29a                          | [64]      |
| GSK3B   | Glycogen synthase kinase 3 beta                           | TS | miR-92a-3p                | miR-106a/363<br>miR-17/92a-1           | [210]     |
|         |                                                           |    | miR-452-3p<br>miR-224-5p  | miR-452/224                            | [195,221] |
|         |                                                           |    | miR-93-5p                 | miR-106b/25/93                         | [81]      |
| HIF1A   | Hypoxia inducible factor 1 subunit alpha                  | O  | miR-18a-5p                | miR-17/92a-1                           | [230]     |
| HNRNPA1 | Heterogeneous nuclear ribonucleoprotein                   | O  | miR-18a-5p                | miR-17/92a-1                           | [455]     |

| A1     |                                                                   |    |             |                                        |       |
|--------|-------------------------------------------------------------------|----|-------------|----------------------------------------|-------|
| ING4   | Inhibitor of growth family member 4                               | TS | miR-18a-5p  | miR-17/92a-1                           | [60]  |
| ITGA5  | Integrin subunit alpha 5                                          | O  | miR-130b-3p | miR-301b/130b                          | [406] |
| ITGB1  | Integrin subunit beta 1                                           | O  | miR-130b-3p | miR-301b/130b                          | [456] |
| ITGB8  | Integrin subunit beta 8                                           | O  | miR-106b-5p | miR-106b/25/93                         | [53]  |
| KIF14  | Kinesin family member 14                                          | O  | miR-200c-3p | miR-200c/141                           | [457] |
| KLF4   | Krüppel like factor 4                                             | TS | miR-92a-3p  | miR-106a/363<br>miR-17/92a-1           | [210] |
|        |                                                                   |    | miR-29a-3p  | miR-29b-1/29a                          | [190] |
| KLK6   | Kallikrein related peptidase 6                                    | O  | miR-203a-3p | miR-203a/203b                          | [458] |
| KRAS   | KRAS proto-oncogene, GTPase                                       | O  | miR-19a-3p  | miR-17/92a-1                           | [229] |
|        |                                                                   |    | miR-96-5p   | miR-183/96/182                         | [167] |
| LGALS1 | Galectin like                                                     | O  | miR-224-5p  | miR-452/224                            | [440] |
| MAP2K4 | Mitogen-activated protein kinase kinase 4                         | TS | miR-141-3p  | miR-200c/141                           | [380] |
| MAP3K5 | Mitogen-activated protein kinase kinase 5                         | TS | miR-20a-5p  | miR-17/92a-1                           | [459] |
| MAP4K4 | Mitogen-activated protein kinase kinase 4                         | O  | miR-141-3p  | miR-200c/141                           | [460] |
| MARK1  | Microtubule affinity regulating kinase 1                          | TS | miR-23a-3p  | miR-23a/27a/24-2                       | [393] |
| MBD2   | Methyl-CpG binding domain protein 2                               | O  | miR-221-5p  | miR-221/222                            | [182] |
|        |                                                                   |    | miR-224-5p  | miR-452/224                            | [182] |
| MCU    | Mitochondrial calcium uniporter                                   | TS | miR-25-3p   | miR-106b/25/93                         | [334] |
| MICA   | MHC class I polypeptide-related sequence A                        | TS | miR-20a-5p  | miR-17/92a-1                           | [461] |
| MMP14  | Matrix metalloproteinase 14                                       | O  | miR-181a-5p | miR-181a-1/181b-1<br>miR-181a-2/181b-2 | [462] |
| MMP2   | Matrix metalloproteinase 2                                        | O  | miR-29a-3p  | miR-29b-1/29a                          | [245] |
| MOAP1  | Modulator of apoptosis 1                                          | TS | miR-92a-3p  | miR-106a/363<br>miR-17/92a-1           | [319] |
| MTDH   | Metadherin                                                        | O  | miR-182-5p  | miR-183/96/182                         | [366] |
| MYC    | MYC proto-oncogene, bHLH transcription factor                     | O  | miR-93-5p   | miR-106b/25/93                         | [222] |
|        |                                                                   |    | miR-182-5p  | miR-183/96/182                         | [223] |
| NCOA3  | Nuclear receptor coactivator 3                                    | TS | miR-17-5p   | miR-17/92a-1                           | [33]  |
| NEDD9  | Neural precursor cell expressed, developmentally down-regulated 9 | O  | miR-25-5p   | miR-106b/25/93                         | [463] |
|        |                                                                   |    | miR-18a-5p  | miR-17/92a-1                           | [439] |
|        |                                                                   |    | miR-203a-3p | miR-203a/203b                          | [464] |
| NF2    | Neurofibromin 2                                                   | TS | miR-92a-3p  | miR-106a/363<br>miR-17/92a-1           | [465] |
| PDCD10 | Programmed cell death 10                                          | TS | miR-425-5p  | miR-191/425                            | [466] |
| PDCD4  | Programmed cell death 4                                           | TS | miR-20a-5p  | miR-17/92a-1                           | [65]  |
|        |                                                                   |    | miR-181b-5p | miR-181a-1/181b-1<br>miR-181a-2/181b-2 | [356] |

|          |                                                            |    |                                       |                                        |                   |
|----------|------------------------------------------------------------|----|---------------------------------------|----------------------------------------|-------------------|
|          |                                                            |    | miR-141-3p                            | miR-200c/141                           | [76]              |
| PDE4D    | Phosphodiesterase 4D                                       | TS | miR-203a-3p                           | miR-203a/203b                          | [384]             |
| PDK4     | Pyruvate dehydrogenase kinase 4                            | TS | miR-23a-3p                            | miR-23a/27a/24-2                       | [467]             |
| PEAK1    | Pseudopodium enriched atypical kinase 1                    | O  | miR-181d-5p                           | miR-181c/181d                          | [161]             |
| PHLPP1   | PH domain leucine-rich-repeat protein phosphatase 1        | TS | miR-224-5p                            | miR-452/224                            | [409]             |
| PHLPP2   | PH domain leucine-rich-repeat protein phosphatase 2        | TS | miR-224-5p                            | miR-452/224                            | [409]             |
|          |                                                            |    | miR-18a-5p                            | miR-17/92a-1                           | [468]             |
| PIAS3    | Protein inhibitor of activated STAT 3                      | TS | miR-181b-5p                           | miR-181a-1/181b-1<br>miR-181a-2/181b-2 | [469]             |
| PLAG1    | PLAG1 Zinc Finger                                          | O  | miR-181a-5p                           | miR-181a-1/181b-1<br>miR-181a-2/181b-2 | [470]             |
| PLK3     | Polo like kinase 3                                         | TS | miR-106b-5p                           | miR-106b/25/93                         | [471]             |
| POU5F1   | POU Class 5 Homeobox 1                                     | O  | miR-20b-5p                            | miR-106a/363                           | [75]              |
| PRICKLE2 | Prickle planar cell polarity protein 2 EPM5                | O  | miR-200c-5p                           | miR-200c/141                           | [472]             |
| PRKCZ    | Protein kinase C zeta                                      | O  | miR-25-5p                             | miR-106b/25/93                         | [473]             |
| PRRX1    | Paired related homeobox 1                                  | TS | miR-106b-5p                           | miR-106b/25/93                         | [234]             |
|          |                                                            |    | miR-106a-3p                           | miR-106a/363                           | [474]             |
|          |                                                            |    | miR-106b-5p<br>miR-93-5p              | miR-106b/25/93                         | [50,234]          |
| PTEN     | Phosphatase and tensin homolog                             | TS | miR-19a-3p<br>miR-17-5p<br>miR-92a-3p | miR-17/92a-1<br>miR-106a/363           | [151,416,<br>475] |
|          |                                                            |    | miR-181a-5p                           | miR-181a-1/181b-1<br>miR-181a-2/181b-2 | [355]             |
|          |                                                            |    | miR-29a-3p                            | miR-29b-1/29a                          | [476]             |
| RASSF1   | Ras association domain family member 1                     | O  | miR-181b-5p                           | miR-181a-1/181b-1<br>miR-181a-2/181b-2 | [357]             |
| RB1CC1   | RB1 inducible coiled-coil 1                                | TS | miR-20a-5p                            | miR-17/92a-1                           | [433]             |
| RBL2     | RB transcriptional corepressor like 2                      | TS | miR-17-5p                             | miR-17/92a-1                           | [150]             |
| RBM4     | RNA binding motif protein 4                                | TS | miR-92a-2-3<br>p                      | miR-106a/363<br>miR-17/92a-1           | [320]             |
| RCN2     | Reticulocalbin 2                                           | TS | miR-183-5p                            | miR-183/96/182                         | [362]             |
| RECK     | Reversion inducing cysteine rich protein with kazal motifs | TS | miR-92a-3p                            | miR-106a/363<br>miR-17/92a-1           | [138]             |
|          |                                                            |    | miR-96-3p                             | miR-183/96/182                         | [477]             |
| RND3     | Rho Family GTPase 3                                        | TS | miR-17-5p                             | miR-17/92a-1                           | [338]             |
| RNF6     | RING finger protein 6                                      | O  | miR-203a-3p                           | miR-203a/203b                          | [422]             |
| ROBO1    | Roundabout guidance receptor 1                             | O  | miR-203a-3p                           | miR-203a/203b                          | [478]             |
| RPS15A   | Ribosomal protein S15A                                     | O  | miR-29a-3p                            | miR-29b-1/29a                          | [404]             |
| RXRA     | Retinoid X receptor alpha                                  | TS | miR-27a-3p                            | miR-23a/27a/24-2                       | [184]             |

|            |                                                              |    |                                        |                                        |                       |
|------------|--------------------------------------------------------------|----|----------------------------------------|----------------------------------------|-----------------------|
| SATB2      | SATB homeobox 2                                              | TS | miR-182-5p                             | miR-183/96/182                         | [364]                 |
| SEMA4C     | Semaphorin 4C                                                | O  | miR-25-3p                              | miR-106b/25/93                         | [61]                  |
| SEMA6D     | Semaphorin 6D                                                | TS | miR-23a-5p                             | miR-23a/27a/24-2                       | [479]                 |
| SFRP1      | Secreted frizzled related protein 1                          | TS | miR-27a-3p                             | miR-23a/27a/24-2                       | [183]                 |
| SFRP2      | Secreted frizzled related protein 2                          | TS | miR-224-5p                             | miR-452/224                            | [221]                 |
| SGPP1      | Sphingosine-1-phosphate phosphatase 1                        | O  | miR-27a-3p                             | miR-23a/27a/24-2                       | [480]                 |
| SIK1       | Salt inducible kinase 1                                      | TS | miR-17-5p                              | miR-17/92a-1                           | [152]                 |
| SIK2       | Salt inducible kinase 2                                      | O  | miR-203a-3p                            | miR-203a/203b                          | [387]                 |
| SIRT1      | Sirtuin 1                                                    | O  | miR-141-3p                             | miR-200c/141                           | [78]                  |
|            |                                                              |    | miR-29b-3p                             | miR-29b-1/29a                          | [239]                 |
| SLAIN2     | SLAIN motif family member 2                                  | O  | miR-106b-5p                            | miR-106b/25/93                         | [74]                  |
| SLC4A4     | Solute carrier family 4 member 4                             | O  | miR-224-5p                             | miR-452/224                            | [440]                 |
| SMAD2      | SMAD family member 2                                         | O  | miR-27a-3p                             | miR-23a/27a/24-2                       | [480]                 |
| SMAD3      | SMAD family member 3                                         | TS | miR-29b-1-5p                           | miR-29b-1/29a                          | [481]                 |
| SMAD4      | SMAD family member 4                                         | TS | miR-18a-5p<br>miR-19b-3p<br>miR-20a-5p | miR-17/92a-1<br>miR-106a/363           | [155,227,<br>228,415] |
|            |                                                              |    | miR-224-5p                             | miR-452/224                            | [198,482]             |
| SMAD7      | SMAD family member 7                                         | TS | miR-92a-3p                             | miR-106a/363<br>miR-17/92a-1           | [483]                 |
|            |                                                              | O  | miR-25-3p<br>miR-93-5p                 | miR-106b/25/93                         | [222,336]             |
| SOX2       | SRY-box transcription factor 2                               | O  | miR-200c-3p                            | miR-200c/141                           | [418]                 |
| SOX4       | SRY-box transcription factor 4                               | O  | miR-363-3p                             | miR-106a/363                           | [327]                 |
| SOX9       | SRY-box transcription factor 9                               | O  | miR-18b-5p                             | miR-106a/363                           | [57]                  |
| SPHK2      | Sphingosine kinase 2                                         | O  | miR-363-3p                             | miR-106a/363                           | [144]                 |
| SRCIN1     | SRC kinase signalling inhibitor 1                            | TS | miR-181a-5p                            | miR-181a-1/181b-1<br>miR-181a-2/181b-2 | [484]                 |
| ST6GALNAC2 | ST6 N-acetylgalactosaminide<br>alpha-2,6-sialyltransferase 2 | TS | miR-182-5p                             | miR-183/96/182                         | [365]                 |
| STAT1      | Signal transducer and activator of<br>transcription 1        | TS | miR-181a-5p                            | miR-181a-1/181b-1<br>miR-181a-2/181b-2 | [485]                 |
| TBPL1      | TATA box-binding protein-like protein 1                      | O  | miR-18a-5p                             | miR-17/92a-1                           | [340]                 |
| TCF4       | Transcription factor 4                                       | O  | miR-181a-5p                            | miR-181a-1/181b-1<br>miR-181a-2/181b-2 | [56]                  |
|            |                                                              |    | miR-203a-3p                            | miR-203a/203b                          | [225]                 |
| TF         | Tissue factor                                                | O  | miR-19a-3p                             | miR-17/92a-1                           | [486]                 |
| TGFB2      | Transforming growth factor beta receptor<br>2                | TS | miR-106a-5p                            | miR-106a/363                           | [209,411]             |
|            |                                                              | O  | miR-17-5p<br>miR-20-5p                 | miR-17/92a-1                           | [228,230]             |

|          |                                                       |    |                           |                                        |         |
|----------|-------------------------------------------------------|----|---------------------------|----------------------------------------|---------|
|          |                                                       |    | miR-19a-3p                |                                        |         |
| TGM2     | Transglutaminase 2                                    | TS | miR-19a-3p                | miR-17/92a-1                           | [487]   |
| THBS1    | Thrombospondin 1                                      | TS | miR-182-5p                | miR-183/96/182                         | [237]   |
|          |                                                       |    | miR-19a-3p                | miR-17/92a-1                           | [236]   |
| THBS2    | Thrombospondin 2                                      | O  | miR-203a-3p               | miR-203a/203b                          | [238]   |
| TIA1     | TIA1 cytotoxic granule associated RNA binding protein | TS | miR-19a-3p                | miR-17/92a-1                           | [488]   |
| TIAM1    | TIAM Rac1 associated GEF 1                            | O  | miR-29b-3p                | miR-29b-1/29a                          | [401]   |
| TIMP3    | TIMP metalloproteinase inhibitor 3                    | TS | miR-191-5p                | miR-191/425                            | [417]   |
| TLE5     | TLE family member 5, transcriptional modulator        | O  | miR-203a-3p               | miR-203a/203b                          | [67]    |
| TNFAIP3  | TNF alpha induced protein 3                           | TS | miR-19a-3p                | miR-17/92a-1                           | [343]   |
|          |                                                       | O  | miR-29a-3p                | miR-29b-1/29a                          | [69]    |
| TP53     | Tumor protein P53                                     | TS | miR-27a-3p                | miR-23a/27a/24-2                       | [396]   |
| TP53INP1 | Tumor protein p53 inducible nuclear protein 1         | TS | miR-96-5p                 | miR-183/96/182                         | [220]   |
| TPM1     | Tropomyosin 1                                         | TS | miR-96-5p                 | miR-183/96/182                         | [363]   |
| TRAF5    | TNF receptor associated factor 5                      | O  | miR-141-3p                | miR-200c/141                           | [179]   |
| TRIM8    | Tripartite motif containing 8                         | TS | miR-106b-5p               | miR-106b/25/93                         | [489]   |
|          |                                                       | TS | miR-17-5p                 | miR-17/92a-1                           | [489]   |
| TUSC3    | Tumor suppressor candidate 3                          | O  | miR-181b-5p               | miR-181a-1/181b-1<br>miR-181a-2/181b-2 | [41]    |
| TYMS     | Thymidylate synthetase                                | O  | miR-203a-3p               | miR-203a/203b                          | [490]   |
| USP3     | Ubiquitin specific peptidase 3                        | TS | miR-224-5p                | miR-452/224                            | [482]   |
| UVRAG    | UV radiation resistance associated                    | TS | miR-183-5p                | miR-183/96/182                         | [361]   |
| VANGL    | VANGL planar cell polarity protein 1                  | O  | miR-27a-3p                | miR-23a/27a/24-2                       | [491]   |
| VEGFA    | Vascular endothelial growth factor A                  | O  | miR-20a-5p                | miR-17/92a-1                           | [230]   |
| VHL      | von Hippel Lindau tumour suppressor                   | TS | miR-24-3p                 | miR-23a/27a/24-2                       | [394]   |
| VIM      | Vimentin                                              | O  | miR-17-5p                 | miR-17/92a-1                           | [413]   |
| VLDLR    | Very low-density lipoprotein receptor                 | TS | miR-200c-3p               | miR-200c/141                           | [372]   |
| WIF1     | WNT inhibitory factor 1                               | TS | miR-181a-5p               | miR-181a-1/181b-1<br>miR-181a-2/181b-2 | [160]   |
| ZEB1     | Zinc finger E-box binding homeobox 1                  | O  | miR-200c-3p<br>miR-141-3p | miR-200c/141                           | [36,47] |

Function of genes in human CRC cell lines was described according referred study, tumour suppressor function was abbreviated as TS and genes with oncogenic function were abbreviated as O.

**Supplementary material S5: List of abbreviated lncRNA and circRNA genes**

|            |                                                                                                   |    |
|------------|---------------------------------------------------------------------------------------------------|----|
| ACVRL1     | Activin A receptor like type 1                                                                    | 26 |
| AGER       | Advanced glycosylation end-product specific receptor                                              | 27 |
| BANCR      | BRAF-activated non-protein coding RNA                                                             | 28 |
| CA3-AS1    | CA3 antisense RNA 1                                                                               | 29 |
| CCAT1      | Colon cancer associated transcript 1                                                              | 30 |
| CDK6       | Cyclin dependent kinase 6                                                                         | 31 |
| CRNDE      | Colorectal neoplasia differentially expressed                                                     | 32 |
| DUSP2      | Dual specificity phosphatase 2                                                                    | 33 |
| FARSA-AS1  | FARSA antisense RNA 1                                                                             | 34 |
| FBXL19-AS1 | FBXL19 antisense RNA 1                                                                            | 35 |
| FBXW7      | F-box and WD repeat domain containing 7                                                           | 36 |
| FENDRR     | FOXF1 adjacent non-coding developmental regulatory RNA                                            | 37 |
| FOXD2-AS1  | FOXD2 adjacent opposite strand RNA 1                                                              | 38 |
| GAS5       | Growth arrest specific 5                                                                          | 39 |
| H19        | H19 imprinted maternally expressed transcript                                                     | 40 |
| HAND2-AS1  | HAND2 antisense RNA 1                                                                             | 41 |
| HOTAIR     | HOX transcript antisense RNA                                                                      | 42 |
| HOTAIRM1   | HOXA transcript antisense RNA, myeloid-specific 1                                                 | 43 |
| LIFR-AS1   | LIFR antisense RNA 1                                                                              | 44 |
| LINC00858  | Long intergenic non-protein coding RNA 858                                                        | 45 |
| LINC01567  | Long intergenic non-protein coding RNA 1567                                                       | 46 |
| LINC02595  | Long intergenic non-protein coding RNA 2595                                                       | 47 |
| LINC-PINT  | Long intergenic non-protein coding RNA, p53 induced transcript                                    | 48 |
| lncRNA ATB | Long noncoding RNA Activated by TGF-beta                                                          | 49 |
| MALAT1     | Metastasis associated lung adenocarcinoma transcript 1                                            | 50 |
| MEG3       | Maternally expressed 3                                                                            | 51 |
| NORAD      | Non-coding RNA activated by DNA damage                                                            | 52 |
| POLR2J4    | RNA polymerase II subunit J4, pseudogene                                                          | 53 |
| SMARCA5    | SWI/SNF related, matrix associated, actin dependent regulator of chromatin, subfamily a, member 5 | 54 |
| SNHG15     | Small nucleolar RNA host gene 15                                                                  | 55 |
| UCA1       | Urothelial cancer associated 1                                                                    | 56 |
| XIRP2-AS1  | XIRP2 antisense RNA 1                                                                             | 57 |
| XIST       | X inactive specific transcript                                                                    | 58 |
| ZEB1-AS1   | ZEB1 antisense RNA 1                                                                              | 59 |
|            |                                                                                                   | 60 |
|            |                                                                                                   | 61 |
|            |                                                                                                   | 62 |
|            |                                                                                                   | 63 |
|            |                                                                                                   | 64 |

|                                                                                               |                                                      |     |
|-----------------------------------------------------------------------------------------------|------------------------------------------------------|-----|
| <i>Supplementary material S6: List of abbreviated target genes of selected miRNA clusters</i> |                                                      | 65  |
| ABCA1                                                                                         | ATP binding cassette subfamily A member 1            | 66  |
| ABCF1                                                                                         | ATP-binding cassette, subfamily F, member 1          | 67  |
| ADAM9                                                                                         | ADAM metalloproteinase domain 9                      | 68  |
| AFDN                                                                                          | Afadin, Adherens junction formation factor           | 69  |
| AGER                                                                                          | Advanced glycosylation end-product specific receptor | 70  |
| AKAP12                                                                                        | A kinase anchor protein 12                           | 71  |
| AKT2                                                                                          | AKT serine/threonine kinase 2                        | 72  |
| AMER1                                                                                         | APC membrane recruitment protein 1                   | 73  |
| ANGPTL8                                                                                       | Angiopoietin like 8                                  | 74  |
| APAF1                                                                                         | Apoptotic peptidase activating factor 1              | 75  |
| AQP8                                                                                          | Aquaporin 8                                          | 76  |
| ARID4                                                                                         | AT-rich interaction domain 4B                        | 77  |
| ATG12                                                                                         | Autophagy related 12                                 | 78  |
| ATG16L1                                                                                       | Autophagy Related 16 Like 1                          | 79  |
| ATG5                                                                                          | Autophagy related 5                                  | 80  |
| ATG7                                                                                          | Autophagy related 7                                  | 81  |
| ATM                                                                                           | ATM serine/threonine kinase                          | 82  |
| ATXN3                                                                                         | Ataxin 3                                             | 83  |
| BCL2L1                                                                                        | BCL2 like 1                                          | 84  |
| BCL2L11                                                                                       | BCL2 like 11                                         | 85  |
| BCL9L                                                                                         | BCL9 like                                            | 86  |
| BID                                                                                           | BH3 interacting domain death agonist                 | 87  |
| BMI1                                                                                          | BMI1 proto-oncogene, polycomb ring finger            | 88  |
| BNIP2                                                                                         | BCL2 interacting protein 2                           | 89  |
| BTG1                                                                                          | BTG anti-proliferation factor 1                      | 90  |
| BTG3                                                                                          | BTG anti-proliferation factor 3                      | 91  |
| CEBPB                                                                                         | CCAAT enhancer binding protein beta                  | 92  |
| CALR                                                                                          | Calreticulin                                         | 93  |
| CCND1                                                                                         | Cyclin D1                                            | 94  |
| CCND2                                                                                         | Cyclin D2                                            | 95  |
| CD274                                                                                         | CD274 molecule                                       | 96  |
| CDC42                                                                                         | Cell division cycle 42                               | 97  |
| CDH1                                                                                          | Cadherin 1                                           | 98  |
| CDK19                                                                                         | Cyclin dependent kinase 19                           | 99  |
| CDK2                                                                                          | Cyclin Dependent Kinase 2                            | 100 |
| CDKN1A                                                                                        | Cyclin dependent kinase inhibitor 1A                 | 101 |



|         |                                                           |     |
|---------|-----------------------------------------------------------|-----|
| CDKN2B  | Cyclin dependent kinase inhibitor 2B                      | 102 |
| CDS2    | CDP-diacylglycerol synthase 2                             | 103 |
| CLU     | Clusterin                                                 | 104 |
| CPEB4   | Cytoplasmic polyadenylation element-binding 4             | 105 |
| CREB1   | cAMP responsive element binding protein 1                 | 106 |
| CRY2    | Cryptochrome circadian regulator 2                        | 107 |
| CSE1L   | Chromosomal segregation 1 like                            | 108 |
| CTNNB1  | Catenin Beta 1                                            | 109 |
| CTNND1  | Catenin delta 1                                           | 110 |
| CTSA    | Cathepsin A                                               | 111 |
| CXCL8   | C-X-C motif chemokine ligand 8                            | 112 |
| CYP7B1  | Cytochrome P450, family 7, subfamily B, member 1          | 113 |
| DAB2IP  | DAB2 interacting protein                                  | 114 |
| DHFR    | Dihydrofolate reductase                                   | 115 |
| DKK3    | Dickkopf WNT signalling pathway inhibitor 3               | 116 |
| DLC1    | DLC1 Rho GTPase activating protein                        | 117 |
| DND1    | DND microRNA-mediated repression inhibitor 1              | 118 |
| DNMT3B  | DNA methyltransferase 3 beta                              | 119 |
| DUSP2   | Dual-specificity phosphatase 2                            | 120 |
| E2F5    | E2F transcription factor 5                                | 121 |
| EGFR    | Epidermal growth factor receptor                          | 122 |
| EIF5A2  | Eukaryotic initiation factor 5A2                          | 123 |
| ETS1    | ETS proto-oncogene 1, transcription Factor                | 124 |
| EZH2    | Enhancer of zeste 2 polycomb repressive complex 2 subunit | 125 |
| F2RL3   | F2R like thrombin or trypsin receptor 3                   | 126 |
| FAM172A | Family with sequence similarity 172 member A              | 127 |
| FBXL3   | F-box and leucine rich repeat protein 3                   | 128 |
| FBXW7   | F-Box and WD repeat domain containing 7                   | 129 |
| FLT1    | Fms related receptor tyrosine kinase 1                    | 130 |
| FOXA1   | Forkhead box A1                                           | 131 |
| FOXF2   | Forkhead box F2                                           | 132 |
| FOXJ2   | Forkhead Box J2                                           | 133 |
| FOXO1   | Forkhead box protein O1                                   | 134 |
| FOXO3a  | Forkhead box protein O3a                                  | 135 |
| FOXQ1   | Forkhead box Q1                                           | 136 |
| GABBR1  | Gamma-amino-butyric acid type B receptor 1                | 137 |
| GATA6   | GATA Binding Protein 6                                    | 138 |
| GEMIN2  | Gem nuclear organelle associated protein 2                | 139 |

|         |                                                                   |     |
|---------|-------------------------------------------------------------------|-----|
| GPC1    | Glypican-1                                                        | 140 |
| GRN     | Granulin precursor                                                | 141 |
| GSK3B   | Glycogen synthase kinase 3 beta                                   | 142 |
| HIF1A   | Hypoxia inducible factor 1 subunit alpha                          | 143 |
| HNRNPA1 | Heterogeneous nuclear ribonucleoprotein A1                        | 144 |
| ING4    | Inhibitor of growth family member 4                               | 145 |
| ITGA5   | Integrin subunit alpha 5                                          | 146 |
| ITGB1   | Integrin subunit beta 1                                           | 147 |
| ITGB8   | Integrin subunit beta 8                                           | 148 |
| KIF14   | Kinesin family member 14                                          | 149 |
| KLF4    | Krüppel like factor 4                                             | 150 |
| KLK6    | Kallikrein related peptidase 6                                    | 151 |
| KRAS    | KRAS proto-oncogene, GTPase                                       | 152 |
| LGALS1  | Galectin like                                                     | 153 |
| MAP2K4  | Mitogen-activated protein kinase kinase 4                         | 154 |
| MAP3K5  | Mitogen-activated protein kinase kinase kinase 5                  | 155 |
| MAP4K4  | Mitogen-activated protein kinase kinase kinase kinase 4           | 156 |
| MARK1   | Microtubule affinity regulating kinase 1                          | 157 |
| MBD2    | Methyl-CpG binding domain protein 2                               | 158 |
| MCU     | Mitochondrial calcium uniporter                                   | 159 |
| MICA    | MHC class I polypeptide-related sequence A                        | 160 |
| MMP14   | Matrix metalloproteinase 14                                       | 161 |
| MMP2    | Matrix metalloproteinase 2                                        | 162 |
| MOAP1   | Modulator of apoptosis 1                                          | 163 |
| MTDH    | Metadherin                                                        | 164 |
| MYC     | MYC proto-oncogene, bHLH transcription factor                     | 165 |
| NCOA3   | Nuclear receptor coactivator 3                                    | 166 |
| NEDD9   | Neural precursor cell expressed, developmentally down-regulated 9 | 167 |
| NF2     | Neurofibromin 2                                                   | 168 |
| PDCD10  | Programmed cell death 10                                          | 169 |
| PDCD4   | Programmed cell death 4                                           | 170 |
| PDE4D   | Phosphodiesterase 4D                                              | 171 |
| PDK4    | Pyruvate dehydrogenase kinase 4                                   | 172 |
| PEAK1   | Pseudopodium enriched atypical kinase 1                           | 173 |
| PHLPP1  | PH domain leucine-rich-repeat protein phosphatase 1               | 174 |
| PHLPP2  | PH domain leucine-rich-repeat protein phosphatase 2               | 175 |
| PIAS3   | Protein inhibitor of activated STAT 3                             | 176 |
| PLAG1   | PLAG1 Zinc Finger                                                 | 177 |

|            |                                                            |     |
|------------|------------------------------------------------------------|-----|
| PLK3       | Polo like kinase 3                                         | 178 |
| POU5F1     | POU Class 5 Homeobox 1                                     | 179 |
| PRICKLE2   | Prickle planar cell polarity protein 2 EPM5                | 180 |
| PRKCZ      | Protein kinase C zeta                                      | 181 |
| PRRX1      | Paired related homeobox 1                                  | 182 |
| PTEN       | Phosphatase and tensin homolog                             | 183 |
| RASSF1     | Ras association domain family member 1                     | 184 |
| RB1CC1     | RB1 inducible coiled-coil 1                                | 185 |
| RBL2       | RB transcriptional corepressor like 2                      | 186 |
| RBM4       | RNA binding motif protein 4                                | 187 |
| RCN2       | Reticulocalbin 2                                           | 188 |
| RECK       | Reversion inducing cysteine rich protein with kazal motifs | 189 |
| RND3       | Rho Family GTPase 3                                        | 190 |
| RNF6       | RING finger protein 6                                      | 191 |
| ROBO1      | Roundabout guidance receptor 1                             | 192 |
| RPS15A     | Ribosomal protein S15A                                     | 193 |
| RXRA       | Retinoid X receptor alpha                                  | 194 |
| SATB2      | SATB homeobox 2                                            | 195 |
| SEMA4C     | Semaphorin 4C                                              | 196 |
| SEMA6D     | Semaphorin 6D                                              | 197 |
| SFRP1      | Secreted frizzled related protein 1                        | 198 |
| SFRP2      | Secreted frizzled related protein 2                        | 199 |
| SGPP1      | Sphingosine-1-phosphate phosphatase 1                      | 200 |
| SIK1       | Salt inducible kinase 1                                    | 201 |
| SIK2       | Salt inducible kinase 2                                    | 202 |
| SIRT1      | Sirtuin 1                                                  | 203 |
| SLAIN2     | SLAIN motif family member 2                                | 204 |
| SLC4A4     | Solute carrier family 4 member 4                           | 205 |
| SMAD2      | SMAD family member 2                                       | 206 |
| SMAD3      | SMAD family member 3                                       | 207 |
| SMAD4      | SMAD family member 4                                       | 208 |
| SMAD7      | SMAD family member 7                                       | 209 |
| SOX2       | SRY-box transcription factor 2                             | 210 |
| SOX4       | SRY-box transcription factor 4                             | 211 |
| SOX9       | SRY-box transcription factor 9                             | 212 |
| SPHK2      | Sphingosine kinase 2                                       | 213 |
| SRCIN1     | SRC kinase signalling inhibitor 1                          | 214 |
| ST6GALNAC2 | ST6 N-acetylgalactosaminide alpha-2,6-sialyltransferase 2  | 215 |

|          |                                                       |     |
|----------|-------------------------------------------------------|-----|
| STAT1    | Signal transducer and activator of transcription 1    | 216 |
| TBPL1    | TATA box-binding protein-like protein 1               | 217 |
| TCF4     | Transcription factor 4                                | 218 |
| TF       | Tissue factor                                         | 219 |
| TGFBR2   | Transforming growth factor beta receptor 2            | 220 |
| TGM2     | Transglutaminase 2                                    | 221 |
| THBS1    | Thrombospondin 1                                      | 222 |
| THBS2    | Thrombospondin 2                                      | 223 |
| TIA1     | TIA1 cytotoxic granule associated RNA binding protein | 224 |
| TIAM1    | TIAM Rac1 associated GEF 1                            | 225 |
| TIMP3    | TIMP metalloproteinase inhibitor 3                    | 226 |
| TLE5     | TLE family member 5, transcriptional modulator        | 227 |
| TNFAIP3  | TNF alpha induced protein 3                           | 228 |
| TP53     | Tumor protein P53                                     | 229 |
| TP53INP1 | Tumor protein p53 inducible nuclear protein 1         | 230 |
| TPM1     | Tropomyosin 1                                         | 231 |
| TRAF5    | TNF receptor associated factor 5                      | 232 |
| TRIM8    | Tripartite motif containing 8                         | 233 |
| TUSC3    | Tumor suppressor candidate 3                          | 234 |
| TYMS     | Thymidylate synthetase                                | 235 |
| USP3     | Ubiquitin specific peptidase 3                        | 236 |
| UVRAG    | UV radiation resistance associated                    | 237 |
| VANGL    | VANGL planar cell polarity protein 1                  | 238 |
| VEGFA    | Vascular endothelial growth factor A                  | 239 |
| VHL      | von Hippel Lindau tumour suppressor                   | 240 |
| VIM      | Vimentin                                              | 241 |
| VLDLR    | Very low-density lipoprotein receptor                 | 242 |
| WIF1     | WNT inhibitory factor 1                               | 243 |
| ZEB1     | Zinc finger E-box binding homeobox 1                  | 244 |
| ZNF217   | Zinc finger protein 217                               | 245 |
|          |                                                       | 246 |

**Supplementary material S8: References cited in Supplemental materials, which were not cited in the main text**

270. Motoyama, K.; Inoue, H.; Takatsuno, Y.; Tanaka, F.; Mimori, K.; Uetake, H.; Sugihara, K.; Mori, M.: Over- and under-expressed microRNAs in human colorectal cancer. *Int J Oncol.* **2009**, *34*, 1069–1075, doi: 10.3892/ijo\_00000233.
271. Arndt, G.M.; Dossey, L.; Cullen, L.M.; Lai, A.; Druker, R.; Eisbacher, M.; Zhang, C.; Tran, N.; Fan, H.; Retzlaff, K.; et al. Characterization of global microRNA expression reveals oncogenic potential of miR-145 in metastatic colorectal cancer. *BMC Cancer* **2009**, *9*, 1–17, doi:10.1186/1471-2407-9-374.
272. Wang, Y.X.; Zhang, X.Y.; Zhang, B.F.; Yang, C.Q.; Chen, X.M.; Gao, H.J. Initial study of microRNA expression profiles of colonic cancer without lymph node metastasis. *J. Dig. Dis.* **2010**, *11*, 50–54, doi:10.1111/j.1751-2980.2009.00413.x.
273. Huang, Z.; Huang, S.; Wang, Q.; Liang, L.; Ni, S.; Wang, L.; Sheng, W.; He, X.; Du, X. MicroRNA-95 Promotes Cell Proliferation and Targets Sorting Nexin 1 in Human Colorectal Carcinoma. *Cancer Res.* **2011**, *71*, 2582–2589, doi:10.1158/0008-5472.can-10-3032.
274. Fu, J.; Tang, W.; Du, P.; Wang, G.; Chen, W.; Li, J.; Zhu, Y.; Gao, J.; Cui, L. Identifying MicroRNA-mRNA regulatory network in colorectal cancer by a combination of expression profile and bioinformatics analysis. *BMC Syst. Biol.* **2012**, *6*, 68, doi:10.1186/1752-0509-6-68.
275. Hamfjord, J.; Stangeland, A.M.; Hughes, T.; Skrede, M.L.; Tveit, K.M.; Ik Dahl, T.; Kure, E.H. Differential Expression of miRNAs in Colorectal Cancer: Comparison of Paired Tumor Tissue and Adjacent Normal Mucosa Using High-Throughput Sequencing. *PLoS ONE* **2012**, *7*, e34150, doi:10.1371/journal.pone.0034150.
276. Chen, W.C.; Lin, M.S.; Ye, Y.L.; Gao, H.J.; Song, Z.Y.; Shen, X.Y. microRNA expression pattern and its alteration following celecoxib intervention in human colorectal cancer. *Exp. Ther. Med.* **2012**, *3*, 1039–1048, doi:10.3892/etm.2012.531.
277. Wu, W.; Li, X.; Zhang, G.; Luo, F.; Ruan, J.; Huang, D.; Feng, D.; Xiao, D.; Zeng, Z.; Chen, X. Identification of aberrantly expressed miRNAs in rectal cancer. *Oncol. Rep.* **2012**, *28*, 77–84, doi:10.3892/or.2012.1769.
278. Mosakhani, N.; Sarhadi, V.K.; Borze, I.; Karjalainen-Lindsberg, M.-L.; Sundström, J.; Ristamäki, R.; Österlund, P.; Knuutila, S. MicroRNA profiling differentiates colorectal cancer according to KRAS status. *Genes Chromosom. Cancer* **2011**, *51*, 1–9, doi:10.1002/gcc.20925.
279. Nishida, N.; Nagahara, M.; Sato, T.; Mimori, K.; Sudo, T.; Tanaka, F.; Shibata, K.; Ishii, H.; Sugihara, K.; Doki, Y.; et al. Microarray Analysis of Colorectal Cancer Stromal Tissue Reveals Upregulation of Two Oncogenic miRNA Clusters. *Clin. Cancer Res.* **2012**, *18*, 3054–3070, doi:10.1158/1078-0432.ccr-11-1078.
280. Chen, W.-S.; Chen, T.-W.; Yang, T.-H.; Hu, L.-Y.; Pan, H.-W.; Leung, C.-M.; Li, S.-C.; Ho, M.-R.; Shu, C.-W.; Liu, P.-F.; et al. Co-modulated behavior and effects of differentially expressed miRNA in colorectal cancer. *BMC Genom.* **2013**, *14*, S12, doi:10.1186/1471-2164-14-s5-s12.
281. Ak, S.; Tunca, B.; Tezcan, G.; Cecener, G.; Egeli, U.; Yilmazlar, T.; Ozturk, E.; Yerci, O. MicroRNA expression patterns of tumors in early-onset colorectal cancer patients. *J. Surg. Res.* **2014**, *191*, 113–122, doi:10.1016/j.jss.2014.03.057.
282. Li, E.; Ji, P.; Ouyang, N.; Zhang, Y.; Wang, X.Y.; Rubin, D.C.; Davidson, N.O.; Bergamaschi, R.; Shroyer, K.R.; Burke, S.; et al. Differential expression of miRNAs in colon cancer between African and Caucasian Americans: Implications for cancer racial health disparities. *Int. J. Oncol.* **2014**, *45*, 587–594, doi:10.3892/ijo.2014.2469.
283. Fukushima, Y.; Iinuma, H.; Tsukamoto, M.; Matsuda, K.; Hashiguchi, Y. Clinical significance of microRNA-21 as a biomarker in each Dukes' stage of colorectal cancer. *Oncol. Rep.* **2014**, *33*, 573–582, doi:10.3892/or.2014.3614.
284. Mo, J.-S.; Alam, K.J.; Kang, I.-H.; Park, W.C.; Seo, G.-S.; Choi, S.-C.; Kim, H.-S.; Moon, H.-B.; Yun, K.-J.; Chae, S.-C. MicroRNA 196B regulates FAS-mediated apoptosis in colorectal cancer cells. *Oncotarget* **2015**, *6*, 2843–2855, doi:10.18632/oncotarget.3066.
285. Peng, J.; Xie, Z.; Cheng, L.; Zhang, Y.; Chen, J.; Yu, H.; Li, Z.; Kang, H. Paired design study by real-time PCR: miR-378\* and miR-145 are potent early diagnostic biomarkers of human colorectal cancer. *BMC Cancer* **2015**, *15*, 158, doi:10.1186/s12885-015-1123-2.
286. Tanoglu, A.; Balta, A.Z.; Berber, U.; Ozdemir, Y.; Emirzeoglu, L.; Sayilir, A.; Sucullu, I. microRNA Expression Profile in Patients with Stage II Colorectal Cancer: A Turkish Referral Center Study. *Asian Pac. J. Cancer Prev.* **2015**, *16*, 1851–1855, doi:10.7314/apjcp.2015.16.5.1851.
287. Wu, X.; Li, S.; Xu, X.; Wu, S.; Chen, R.; Jiang, Q.; Li, Y.; Xu, Y. The potential value of miR-1 and miR-374b as biomarkers for colorectal cancer. *Int. J. Clin. Exp. Pathol.* **2015**, *8*, 2840–2851.
288. Neerinx, M.; Sie, D.L.S.; Van De Wiel, M.A.; Van Grieken, N.C.T.; Burggraaf, J.D.; Dekker, H.; Eijk, P.P.; Ylstra, B.; Verhoef, C.; Meijer, G.A.; et al. MiR expression profiles of paired primary colorectal cancer and metastases by next-generation sequencing. *Oncogene* **2015**, *4*, e170, doi:10.1038/oncsis.2015.29.
289. Meng, W.-J.; Yang, L.; Ma, Q.; Zhang, H.; Adell, G.; Arbman, G.; Wang, Z.-Q.; Li, Y.; Zhou, Z.-G.; Sun, X.-F. MicroRNA Expression Profile Reveals miR-17-92 and miR-143-145 Cluster in Synchronous Colorectal Cancer. *Med.* **2015**, *94*, e1297, doi:10.1097/md.0000000000001297.
290. Kara, M.; Yumrutas, O.; Ozcan, O.; Celik, O.I.; Bozgeyik, E.; Bozgeyik, I.; Tasdemir, S. Differential expressions of cancer-associated genes and their regulatory miRNAs in colorectal carcinoma. *Gene* **2015**, *567*, 81–86, doi:10.1016/j.gene.2015.04.065.
291. Ozcan, O.; Kara, M.; Yumrutas, O.; Bozgeyik, E.; Bozgeyik, I.; Celik, O.I. MTUS1 and its targeting miRNAs in colorectal carcinoma: Significant associations. *Tumor Biol.* **2016**, *37*, 6637–6645, doi:10.1007/s13277-015-4550-4.
292. Pelossof, R.; Chow, O.S.; Fairchild, L.; Smith, J.J.; Setty, M.; Chen, C.-T.; Chen, Z.; Egawa, F.; Avila, K.; Leslie, C.S.; et al. Integrated genomic profiling identifies microRNA-92a regulation of IQGAP2 in locally advanced rectal cancer. *Genes, Chromosom. Cancer* **2016**, *55*, 311–321, doi:10.1002/gcc.22329.

293. Sun, G.; Cheng, Y.-W.; Lai, L.; Huang, T.-C.; Wang, J.; Wu, X.; Wang, Y.; Huang, Y.; Wang, J.; Zhang, K.; et al. Signature miRNAs in colorectal cancers were revealed using a bias reduction small RNA deep sequencing protocol. *Oncotarget* **2015**, *7*, 3857–3872, doi:10.18632/oncotarget.6460. 308
294. Zekri, A.-R.N.; Youssef, A.S.E.-D.; Lotfy, M.M.; Gabr, R.; Ahmed, O.S.; Nassar, A.; Hussein, N.; Omran, D.; Medhat, E.; Eid, S.; et al. Circulating Serum miRNAs as Diagnostic Markers for Colorectal Cancer. *PLoS ONE* **2016**, *11*, e0154130, doi:10.1371/journal.pone.0154130. 309
295. Li, Y.; Chen, M.; Liu, J.; Li, L.; Yang, X.; Zhao, J.; Wu, M.; Ye, M. Upregulation of MicroRNA 18b Contributes to the Development of Colorectal Cancer by Inhibiting CDKN2B. *Mol. Cell. Biol.* **2017**, *37*, e00391-17, doi:10.1128/mcb.00391-17. 310
296. Nagy, Z.B.; Wichmann, B.; Kalmár, A.; Galamb, O.; Barták, B.K.; Spisák, S.; Tulassay, Z.; Molnár, B. Colorectal adenoma and carcinoma specific miRNA profiles in biopsy and their expression in plasma specimens. *Clin. Epigenetics* **2017**, *9*, 1–14, doi:10.1186/s13148-016-0305-3. 311
297. Wu, F.; Yuan, G.; Chen, J.; Wang, C. Network analysis based on TCGA reveals hub genes in colon cancer. *Współczesna Onkologia* **2017**, *21*, 136–144, doi:10.5114/wo.2017.68622. 312
298. Du, B.; Wu, D.; Yang, X.; Wang, T.; Shi, X.; Lv, Y.; Zhou, Z.; Liu, Q.; Zhang, W. The expression and significance of microRNA in different stages of colorectal cancer. *Med.* **2018**, *97*, e9635, doi:10.1097/md.0000000000009635. 313
299. Pellatt, A.J.; Mullany, L.E.; Herrick, J.S.; Sakoda, L.C.; Wolff, R.K.; Samowitz, W.S.; Slattery, M.L. The TGF $\beta$ -signaling pathway and colorectal cancer: Associations between dysregulated genes and miRNAs. *J. Transl. Med.* **2018**, *16*, 191, doi:10.1186/s12967-018-1566-8. 314
300. Zhang, Y.; Guo, L.; Li, Y.; Feng, G.-H.; Teng, F.; Li, W.; Zhou, Q. MicroRNA-494 promotes cancer progression and targets adenomatous polyposis coli in colorectal cancer. *Mol. Cancer* **2018**, *17*, 1–11, doi:10.1186/s12943-017-0753-1. 315
301. Brînzan, C.; Aşchie, M.; Matei, E.; Mitroi, A.; Cozaru, G. Molecular expression profiles of selected microRNAs in colorectal adenocarcinoma in patients from south-eastern part of Romania. *Medicine* **2019**, *98*, e18122, doi:10.1097/md.00000000000018122. 316
302. Li, J.; Zhong, Y.; Cai, S.; Zhou, P.; Yao, L. MicroRNA expression profiling in the colorectal normal-adenoma-carcinoma transition. *Oncol. Lett.* **2019**, *18*, 2013–2018, doi:10.3892/ol.2019.10464. 317
303. Zhang, H.; Zhu, M.; Shan, X.; Zhou, X.; Wang, T.; Zhang, J.; Tao, J.; Cheng, W.; Chen, G.; Li, J.; et al. A panel of seven-miRNA signature in plasma as potential biomarker for colorectal cancer diagnosis. *Gene* **2019**, *687*, 246–254, doi:10.1016/j.gene.2018.11.055. 318
304. Gungormez, C.; Aktas, H.G.; Dilsiz, N.; Borazan, E. Novel miRNAs as potential biomarkers in stage II colon cancer: Microarray analysis. *Mol. Biol. Rep.* **2019**, *46*, 4175–4183, doi:10.1007/s11033-019-04868-7. 319
305. Hao, S.; Huo, S.; Du, Z.; Yang, Q.; Ren, M.; Liu, S.; Liu, T.; Zhang, G. MicroRNA-related transcription factor regulatory networks in human colorectal cancer. *Med.* **2019**, *98*, e15158, doi:10.1097/md.00000000000015158. 320
306. Wei, L.; Chen, Z.; Cheng, N.; Li, X.; Chen, J.; Wu, D.; Dong, M.; Wu, X. MicroRNA-126 Inhibit Viability of Colorectal Cancer Cell by Repressing mTOR Induced Apoptosis and Autophagy. *Onco. Targ. Ther.* **2020**, *13*, 2459–2468, doi:10.2147/OTT.S238348. 321
307. Milanesi, E.; Dobre, M.; Bucuroiu, A.I.; Herlea, V.; Manuc, T.E.; Salvi, A.; De Petro, G.; Manuc, M.; Becheanu, G. miRNAs-Based Molecular Signature for KRAS Mutated and Wild Type Colorectal Cancer: An Explorative Study. *J. Immunol. Res.* **2020**, *2020*, 1–9, doi:10.1155/2020/4927120. 322
308. Zhou, F.; Tang, D.; Xu, Y.; He, H.; Wu, Y.; Lin, L.; Dong, J.; Tan, W.; Dai, Y. Identification of microRNAs and their Endonucleolytic Cleaved target mRNAs in colorectal cancer. *BMC Cancer* **2020**, *20*, 242–15, doi:10.1186/s12885-020-06717-4. 323
309. Kral, J.; Korenkova, V.; Novosadova, V.; Langerova, L.; Schneiderova, M.; Liska, V.; Levy, M.; Veskrnova, V.; Spicak, J.; Opatova, A.; et al. Expression profile of miR-17/92 cluster is predictive of treatment response in rectal cancer. *Carcinogene* **2018**, *39*, 1359–1367, doi:10.1093/carcin/bgy100. 324
310. Zhu, G.-F.; Xu, Y.-W.; Li, J.; Niu, H.-L.; Ma, W.-X.; Xu, J.; Zhou, P.-R.; Liu, X.; Ye, D.-L.; Liu, X.-R.; et al. Mir20a/106a-WTX axis regulates RhoGDIa/CDC42 signaling and colon cancer progression. *Nat. Commun.* **2019**, *10*, 1–14, doi:10.1038/s41467-018-07998-x. 325
311. Qin, Y.; Chen, X.; Liu, Z.; Tian, X.; Huo, Z. miR-106a Reduces 5-Fluorouracil (5-FU) Sensitivity of Colorectal Cancer by Targeting Dual-Specificity Phosphatases 2 (DUSP2). *Med. Sci. Monit.* **2018**, *24*, 4944–4951, doi:10.12659/msm.910016. 326
312. Xusheng, Z.; Wang, G.; Zhang, L.; Zhai, C.; Zhang, J.; Zhao, X.; Jiang, X.; Zhao, Z. Biological effects and clinical characteristics of microRNA-106a in human colorectal cancer. *Oncol. Lett.* **2017**, *14*, 830–836, doi:10.3892/ol.2017.6179. 327
313. Huang, G.; Ma, J.; Zhang, L. Integrin Subunit Alpha 5 (ITGA5) Gene Circular RNA Sponges microRNA-107 in Colorectal Carcinoma Cells and Tissues and Regulates the Expression of the Forkhead Box J3 (FOXJ3) Gene. *Med. Sci. Monit.* **2020**, *26*, doi:10.12659/msm.920623. 328
314. Jo, P.; Azizian, A.; Salendo, J.; Kramer, F.; Bernhardt, M.; Wolff, H.A.; Gruber, J.; Grade, M.; Beißbarth, T.; Ghadimi, B.M.; et al. Changes of Microrna Levels in Plasma of Patients with Rectal Cancer during Chemoradiotherapy. *Int. J. Mol. Sci.* **2017**, *18*, 1140, doi:10.3390/ijms18061140. 329
315. Yamaguchi, T.; Iijima, T.; Wakaume, R.; Takahashi, K.; Matsumoto, H.; Nakano, D.; Nakayama, Y.; Mori, T.; Horiguchi, S.; Miyaki, M. Underexpression of miR-126 and miR-20b in Hereditary and Nonhereditary Colorectal Tumors. *Oncology* **2014**, *87*, 58–66, doi:10.1159/000363303. 330
316. Li, J.; Feng, Y.; Heng, D.; Chen, R.; Wang, Y.; Xu, Z.; Zhang, D.; Zhang, C.; Zhang, Y.; Ji, D.; et al. Circulating non-coding RNA cluster predicted the tumorigenesis and development of colorectal carcinoma. *Aging* **2020**, *12*, 23047–23066, doi:10.18632/aging.104055. 331
317. Zhang, J.; Wang, Z.; Han, X.; Jiang, L.; Ge, R.; Wang, X.; Li, J. Up-regulation of microRNA-19b is associated with metastasis and predicts poor prognosis in patients with colorectal cancer. *Int. J. Clin. Exp. Pathol* **2018**, *11*, 3952–3960. 332

318. Jiang, H.; Wang, P.; Wang, Q.; Wang, B.; Mu, J.; Zhuang, X.; Zhang, L.; Yan, J.; Miller, D.; Zhang, H.-G. Quantitatively Controlling Expression of miR-17~92 Determines Colon Tumor Progression in a Mouse Tumor Model. *Am. J. Pathol.* **2014**, *184*, 1355–1368, doi:10.1016/j.ajpath.2014.01.037.
319. Hu, J.L.; Wang, W.; Lan, X.L.; Zeng, Z.C.; Liang, Y.S.; Yan, Y.R.; Song, F.Y.; Wang, F.F.; Zhu, X.H.; Liao, W.J.; et al. CAFs secreted exosomes promote metastasis and chemotherapy resistance by enhancing cell stemness and epithelial-mesenchymal transition in colorectal cancer. *Mol. Cancer* **2019**, *18*, 1–15, doi:10.1186/s12943-019-1019-x.
320. Liang, Y.-C.; Lin, W.-C.; Lin, Y.-J.; Lin, J.-C. The impact of RNA binding motif protein 4-regulated splicing cascade on the progression and metabolism of colorectal cancer cells. *Oncotarget* **2015**, *6*, 38046–38060, doi:10.18632/oncotarget.5710.
321. Jepsen, R.K.; Novotny, G.; Klarskov, L.L.; Christensen, I.J.; Riis, L.B.; Høgdall, E. Intra-tumor heterogeneity of microRNA-92a, microRNA-375 and microRNA-424 in colorectal cancer. *Exp. Mol. Pathol.* **2016**, *100*, 125–131, doi:10.1016/j.yexmp.2015.12.004.
322. Eylem, C.C.; Yilmaz, M.; Derkus, B.; Nemutlu, E.; Camci, C.B.; Yilmaz, E.; Turkoglu, M.A.; Aytac, B.; Ozyurt, N.; Emregul, E. Untargeted multi-omic analysis of colorectal cancer-specific exosomes reveals joint pathways of colorectal cancer in both clinical samples and cell culture. *Cancer Lett.* **2020**, *469*, 186–194, doi:10.1016/j.canlet.2019.10.038.
323. Vega, A.B.; Pericay, C.; Moya, I.; Ferrer, A.; Dotor, E.; Pisa, A.; Casals, A.; Serra-Aracil, X.; Oliva, J.-C.; Ruiz, A.; et al. microRNA expression profile in stage III colorectal cancer: Circulating miR-18a and miR-29a as promising biomarkers. *Oncol. Rep.* **2013**, *30*, 320–326, doi:10.3892/or.2013.2475.
324. Wang, S.; Xiang, J.; Li, Z.; Lu, S.; Hu, J.; Gao, X.; Yu, L.; Wang, L.; Wang, J.; Wu, Y.; et al. A plasma microRNA panel for early detection of colorectal cancer. *Int. J. Cancer* **2013**, *136*, 152–161, doi:10.1002/ijc.28136.
325. Luo, X.; Stock, C.; Burwinkel, B.; Brenner, H. Identification and Evaluation of Plasma MicroRNAs for Early Detection of Colorectal Cancer. *PLoS ONE* **2013**, *8*, e62880, doi:10.1371/journal.pone.0062880.
326. Fu, F.; Jiang, W.; Zhou, L.; Chen, Z. Circulating Exosomal miR-17-5p and miR-92a-3p Predict Pathologic Stage and Grade of Colorectal Cancer. *Transl. Oncol.* **2018**, *11*, 221–232, doi:10.1016/j.tranon.2017.12.012.
327. Hu, F.; Min, J.; Cao, X.; Liu, L.; Ge, Z.; Hu, J.; Li, X. MiR-363-3p inhibits the epithelial-to-mesenchymal transition and suppresses metastasis in colorectal cancer by targeting Sox4. *Biochem. Biophys. Res. Commun.* **2016**, *474*, 35–42, doi:10.1016/j.bbrc.2016.04.055.
328. Li, G. Expression of RUNX3 gene and miR-363 in colorectal cancer and the relationship with clinicopathological features. *Oncol. Lett.* **2019**, *18*, 2278–2285, doi:10.3892/ol.2019.10566.
329. Zhang, G.-J.; Li, J.-S.; Zhou, H.; Xiao, H.-X.; Li, Y.; Zhou, T. MicroRNA-106b promotes colorectal cancer cell migration and invasion by directly targeting DLC1. *J. Exp. Clin. Cancer Res.* **2015**, *34*, 1–11, doi:10.1186/s13046-015-0189-7.
330. Liu, H.; Liu, Y.; Sun, P.; Leng, K.; Xu, Y.; Mei, L.; Han, P.; Zhang, B.; Yao, K.; Li, C.; et al. Colorectal cancer-derived exosomal miR-106b-3p promotes metastasis by down-regulating DLC-1 expression. *Clin. Sci.* **2020**, *134*, 419–434, doi:10.1042/cs20191087.
331. Wang, Y.-X.; Lang, F.; Liu, Y.-X.; Yang, C.-Q.; Gao, H.-J. In situ hybridization analysis of the expression of miR-106b in colonic cancer. *Int. J. Clin. Exp. Pathol.* **2015**, *8*, 786–792.
332. Ni, S.; Weng, W.; Xu, M.; Wang, Q.; Tan, C.; Sun, H.; Wang, L.; Huang, D.; Du, X.; Sheng, W. miR-106b-5p inhibits the invasion and metastasis of colorectal cancer by targeting CTSA. *OncoTargets Ther.* **2018**, *11*, 3835–3845, doi:10.2147/ott.s172887.
333. Chen, X.; Liu, J.; Zhang, Q.; Liu, B.; Cheng, Y.; Zhang, Y.; Sun, Y.; Ge, H.; Liu, Y. Exosome-mediated transfer of miR-93-5p from cancer-associated fibroblasts confer radioresistance in colorectal cancer cells by downregulating FOXA1 and upregulating TGFβ3. *J. Exp. Clin. Cancer Res.* **2020**, *39*, 65–15, doi:10.1186/s13046-019-1507-2.
334. Marchi, S.; Lupini, L.; Patergnani, S.; Rimessi, A.; Missiroli, S.; Bonora, M.; Bononi, A.; Corrà, F.; Giorgi, C.; De Marchi, E.; et al. Downregulation of the Mitochondrial Calcium Uniporter by Cancer-Related miR-25. *Curr. Biol.* **2013**, *23*, 58–63, doi:10.1016/j.cub.2012.11.026.
335. Zeng, Z.; Li, Y.; Pan, Y.; Lan, X.; Song, F.; Sun, J.; Zhou, K.; Liu, X.; Ren, X.; Wang, F.; et al. Cancer-derived exosomal miR-25-3p promotes pre-metastatic niche formation by inducing vascular permeability and angiogenesis. *Nat. Commun.* **2018**, *9*, 1–14, doi:10.1038/s41467-018-07810-w.
336. Li, Q.; Zou, C.; Zou, C.; Han, Z.; Xiao, H.; Wei, H.; Wang, W.; Zhang, L.; Zhang, X.; Tang, Q.; et al. MicroRNA-25 functions as a potential tumor suppressor in colon cancer by targeting Smad7. *Cancer Lett.* **2013**, *335*, 168–174, doi:10.1016/j.canlet.2013.02.029.
337. Wang, D.; Wang, X.; Si, M.; Yang, J.; Sun, S.; Wu, H.; Cui, S.; Qu, X.; Yu, X. Exosome-encapsulated miRNAs contribute to CXCL12/CXCR4-induced liver metastasis of colorectal cancer by enhancing M2 polarization of macrophages. *Cancer Lett.* **2020**, *474*, 36–52, doi:10.1016/j.canlet.2020.01.005.
338. Luo, H.; Zou, J.; Dong, Z.; Zeng, Q.; Wu, D.; Liu, L. Up-regulated miR-17 promotes cell proliferation, tumour growth and cell cycle progression by targeting the RND3 tumour suppressor gene in colorectal carcinoma. *Biochem. J.* **2012**, *442*, 311–321, doi:10.1042/bj20111517.
339. Lu, D.; Tang, L.; Zhuang, Y.; Zhao, P. miR-17-3P regulates the proliferation and survival of colon cancer cells by targeting Par4. *Mol. Med. Rep.* **2017**, *17*, 618–623, doi:10.3892/mmr.2017.7863.
340. Liu, G.; Liu, Y.; Yang, Z.; Wang, J.; Li, D.; Zhang, X. Tumor suppressor microRNA-18a regulates tumor proliferation and invasion by targeting TBPL1 in colorectal cancer cells. *Mol. Med. Rep.* **2015**, *12*, 7643–7648, doi:10.3892/mmr.2015.4335.
341. Yin, Y.; Zhong, J.; Li, S.-W.; Li, J.-Z.; Zhou, M.; Chen, Y.; Sang, Y.; Liu, L. TRIM11, a direct target of miR-24-3p, promotes cell proliferation and inhibits apoptosis in colon cancer. *Oncotarget* **2016**, *7*, 86755–86765, doi:10.18632/oncotarget.13550.
342. Huang, L.; Wang, X.; Wen, C.; Yang, X.; Song, M.; Chen, J.; Wang, C.; Zhang, B.; Wang, L.; Iwamoto, A.; et al. Hsa-miR-19a is associated with lymph metastasis and mediates the TNF-α induced epithelial-to-mesenchymal transition in colorectal cancer. *Sci. Rep.* **2015**, *5*, 13350, doi:10.1038/srep13350.

343. Wang, T.; Xu, X.; Xu, Q.; Ren, J.; Shen, S.; Fan, C.; Hou, Y. miR-19a promotes colitis-associated colorectal cancer by regulating tumor necrosis factor alpha-induced protein 3-NF- $\kappa$ B feedback loops. *Oncogene* **2016**, *36*, 3240–3251, doi:10.1038/nc.2016.468.
344. Maminezhad, H.; Ghanadian, S.; Pakravan, K.; Razmara, E.; Rouhollah, F.; Mossahebi-Mohammadi, M.; Babashah, S. A panel of six-circulating miRNA signature in serum and its potential diagnostic value in colorectal cancer. *Life Sci.* **2020**, *258*, 118226, doi:10.1016/j.lfs.2020.118226.
345. Marcuello, M.; Duran-Sanchon, S.; Moreno, L.; Lozano, J.J.; Bujanda, L.; Castells, A.; Gironella, M. Analysis of A 6-Mirna Signature in Serum from Colorectal Cancer Screening Participants as Non-Invasive Biomarkers for Advanced Adenoma and Colorectal Cancer Detection. *Cancers* **2019**, *11*, 1542, doi:10.3390/cancers11101542.
346. Zhu, M.; Huang, Z.; Zhu, D.; Zhou, X.; Shan, X.; Qi, L.-W.; Wu, L.; Cheng, W.; Zhu, J.; Zhang, L.; et al. A panel of microRNA signature in serum for colorectal cancer diagnosis. *Oncotarget* **2017**, *8*, 17081–17091, doi:10.18632/oncotarget.15059.
347. Yu, F.-B.; Sheng, J.; Yu, J.-M.; Liu, J.-H.; Qin, X.-X.; Mou, B. MiR-19a-3p regulates the Forkhead box F2-mediated Wnt/ $\beta$ -catenin signaling pathway and affects the biological functions of colorectal cancer cells. *World J. Gastroenterol.* **2020**, *26*, 627–644, doi:10.3748/wjg.v26.i6.627.
348. Eslamizadeh, S.; Heidari, M.; Agah, S.; Faghihloo, E.; Ghazi, H.; Mirzaei, A.; Akbari, A. The Role of MicroRNA Signature as Diagnostic Biomarkers in Different Clinical Stages of Colorectal Cancer. *Cell J.* **2018**, *20*, 220–230.
349. Xu, T.; Jing, C.; Shi, Y.; Miao, R.; Peng, L.; Kong, S.; Ma, Y.; Li, L. microRNA-20a enhances the epithelial-to-mesenchymal transition of colorectal cancer cells by modulating matrix metalloproteinases. *Exp. Ther. Med.* **2015**, *10*, 683–688, doi:10.3892/etm.2015.2538.
350. Huang, G.; Chen, X.; Cai, Y.; Wang, X.; Xing, C. miR-20a-directed regulation of BID is associated with the TRAIL sensitivity in colorectal cancer. *Oncol. Rep.* **2016**, *37*, 571–578, doi:10.3892/or.2016.5278.
351. Zhu, H.; Ji, Y.; Li, W.; Wu, M. Identification of key pathways and genes in colorectal cancer to predict the prognosis based on mRNA interaction network. *Oncol. Lett.* **2019**, *18*, 3778–3786, doi:10.3892/ol.2019.10698.
352. Jin, H.; Fan, Y.; Yang, Q.; Wang, S.; Huang, J.; Xia, C. Serum miR-20a and miR-486 are potential biomarkers for discriminating colorectal neoplasia: A pilot study. *J. Cancer Res. Ther.* **2018**, *14*, 1572, doi:10.4103/jcrt.jcrt\_1198\_16.
353. Shi, Y.; Liu, Z. Serum miR-92a-1 is a novel diagnostic biomarker for colorectal cancer. *J. Cell. Mol. Med.* **2020**, *24*, 8363–8367, doi:10.1111/jcmm.15282.
354. Wang, J.; Huang, S.-K.; Zhao, M.; Yang, M.; Zhong, J.-L.; Gu, Y.-Y.; Peng, H.; Che, Y.-Q.; Huang, C.-Z. Identification of a Circulating MicroRNA Signature for Colorectal Cancer Detection. *PLoS ONE* **2014**, *9*, e87451, doi:10.1371/journal.pone.0087451.
355. Wei, Z.; Cui, L.; Mei, Z.; Liu, M.; Zhang, D. miR-181a mediates metabolic shift in colon cancer cells via the PTEN/AKT pathway. *FEBS Lett.* **2014**, *588*, 1773–1779, doi:10.1016/j.febslet.2014.03.037.
356. Liu, Y.; Guo, Y.; Liang, H.; Cheng, R.; Yang, F.; Hong, Y.; Zhao, C.; Liu, M.; Yu, M.; Zhou, X.; et al. miR-181b functions as an oncomiR in colorectal cancer by targeting PDCD4. *Protein Cell* **2016**, *7*, 722–734, doi:10.1007/s13238-016-0313-2.
357. Zhao, L.-D.; Zheng, W.-W.; Wang, G.-X.; Kang, X.-C.; Qin, L.; Ji, J.-J.; Hao, S. Epigenetic silencing of miR-181b contributes to tumorigenicity in colorectal cancer by targeting RASSF1A. *Int. J. Oncol.* **2016**, *48*, 1977–1984, doi:10.3892/ijo.2016.3414.
358. Chira, A.; Muresan, M.-S.; Braicu, C.; Budisan, L.; Raduly, L.; Chira, R.I.; Dumitrascu, D.L.; Berindan-Neagoe, I. Mir-23a and mir-181b serum levels in irritable bowel syndrome and colorectal cancer—A pilot study. *Bosn. J. Basic Med. Sci.* **2019**, *20*, 254–261, doi:10.17305/bjbm.2019.4392.
359. Yilmaz, N.; Yilmaz, U.; Tanbek, K.; Arikian, S.; Aksakal, N.; Zeybek, U.; Ergen, A. The role of miRNAs targeting K-ras and APC genes in colorectal cancer. *Bratisl. Med. J.* **2020**, *121*, 554–557, doi:10.4149/bll\_2020\_092.
360. Yuan, D.; Li, K.; Zhu, K.; Yan, R.; Dang, C. Plasma miR-183 predicts recurrence and prognosis in patients with colorectal cancer. *Cancer Biol. Ther.* **2015**, *16*, 268–275, doi:10.1080/15384047.2014.1002327.
361. Huangfu, L.; Liang, H.; Wang, G.; Su, X.; Li, L.; Du, Z.; Hu, M.; Dong, Y.; Bai, X.; Liu, T.; et al. miR-183 regulates autophagy and apoptosis in colorectal cancer through targeting of UVRAG. *Oncotarget* **2015**, *7*, 4735–4745, doi:10.18632/oncotarget.6732.
362. Wang, G.; Zhou, J.; Lu, F.; Qiu, L.; Xu, L.; Yang, X.; Miao, Y. Downregulation of microRNA-183-5p inhibits the proliferation and invasion of colorectal cancer cells by inactivating the reticulocalbin-2/Wnt/ $\beta$ -catenin signaling pathway. *Mol. Med. Rep.* **2019**, *19*, 4475–4483, doi:10.3892/mmr.2019.10059.
363. Ge, T.; Xiang, P.; Mao, H.; Tang, S.; Zhou, J.; Zhang, Y. Inhibition of miR-96 enhances the sensitivity of colorectal cancer cells to oxaliplatin by targeting TPM1. *Exp. Ther. Med.* **2020**, *20*, 2134–2140, doi:10.3892/etm.2020.8936.
364. Yang, M.-H.; Yu, J.; Jiang, D.-M.; Li, W.-L.; Wang, S.; Ding, Y.-Q. microRNA-182 targets special AT-rich sequence-binding protein 2 to promote colorectal cancer proliferation and metastasis. *J. Transl. Med.* **2014**, *12*, 109, doi:10.1186/1479-5876-12-109.
365. Liu, B.; Liu, Y.; Zhao, L.; Pan, Y.; Shan, Y.; Lifan, Z.; Yujia, S. Upregulation of microRNA-135b and microRNA-182 promotes chemoresistance of colorectal cancer by targeting ST6GALNAC2 via PI3K/AKT pathway. *Mol. Carcinog.* **2017**, *56*, 2669–2680, doi:10.1002/mc.22710.
366. Jin, Y.; Zhang, Z.-L.; Huang, Y.; Zhang, K.-N.; Xiong, B. MiR-182-5p inhibited proliferation and metastasis of colorectal cancer by targeting MTDH. *Eur. Rev. Med. Pharmacol. Sci.* **2019**, *23*, 1494–1501.
367. Al-Sheikh, Y.A.; Ghneim, H.K.; Alharbi, K.K.; Aboul-Soud, M.A. Screening for differentially-expressed microRNA biomarkers in Saudi colorectal cancer patients by small RNA deep sequencing. *Int. J. Mol. Med.* **2019**, *44*, 2027–2036, doi:10.3892/ijmm.2019.4362.
368. Xi, X.-P.; Zhuang, J.; Teng, M.-J.; Xia, L.-J.; Yang, M.-Y.; Liu, Q.-G.; Chen, J.-B. MicroRNA-17 induces epithelial-mesenchymal transition consistent with the cancer stem cell phenotype by regulating CYP7B1 expression in colon cancer. *Int. J. Mol. Med.* **2016**, *38*, 499–506, doi:10.3892/ijmm.2016.2624.



369. Zhang, X.-D.; Li, K.-K.; Gao, L.; Li, S.-Z.; Chen, K.; Zhang, J.-B.; Wang, D.; Tu, R.-F.; Zhang, J.-X.; Tao, K.-X.; et al. miR-191 promotes tumorigenesis of human colorectal cancer through targeting C/EBP $\beta$ . *Oncotarget* **2015**, *6*, 4144–4158, doi:10.18632/oncotarget.2864. 492
370. Hu, T.; Wu, X.; Li, K.; Li, Y.; He, P.; Wu, Z.; Jie, F.; Liu, W.; Guan, M. AKAP12 Endogenous Transcripts Suppress The Proliferation, Migration And Invasion Of Colorectal Cancer Cells By Directly Targeting oncomiR-183-5p. *OncoTargets Ther.* **2019**, *12*, 8301–8310, doi:10.2147/OTT.S207600. 493
371. Ding, M.; Zhang, T.; Li, S.; Zhang, Y.; Qiu, Y.; Zhang, B. Correlation analysis between liver metastasis and serum levels of miR-200 and miR-141 in patients with colorectal cancer. *Mol. Med. Rep.* **2017**, *16*, 7791–7795, doi:10.3892/mmr.2017.7538. 494
372. Kim, B.-K.; Yoo, H.-I.; Lee, A.-R.; Choi, K.; Yoon, S.K. Decreased expression of VLDLR is inversely correlated with miR-200c in human colorectal cancer. *Mol. Carcinog.* **2017**, *56*, 1620–1629, doi:10.1002/mc.22618. 495
373. Chen, J.; Wang, W.; Zhang, Y.; Chen, Y.; Hu, T. Predicting distant metastasis and chemoresistance using plasma miRNAs. *Med. Oncol.* **2013**, *31*, 1–7, doi:10.1007/s12032-013-0799-x. 496
374. Mazraehshah, M.K.; Tavangar, S.M.; Saidijam, M.; Amini, R.; Bahreini, F.; Dermani, F.K.; Najafi, R. Anticancer effects of miR-200c in colorectal cancer through BMI1. *Cell. Biochem. Med.* **2018**, *119*, 10005–10012, doi:10.1002/jcb.27330. 497
375. Ye, J.; Wei, X.; Shang, Y.; Pan, Q.; Yang, M.; Tian, Y.; He, Y.; Peng, Z.; Chen, L.; Chen, W.; et al. Core 3 mucin-type O-glycan restoration in colorectal cancer cells promotes MUC1/p53/miR-200c-dependent epithelial identity. *Oncogene* **2017**, *36*, 6391–6407, doi:10.1038/ncr.2017.241. 498
376. Bahnassy, A.A.; Salem, S.E.; El-Sayed, M.; Khorshid, O.; Lateif, M.A.; Youssef, A.S.; Mohanad, M.; Hussein, M.; Zekri, A.-R.; Ali, N.M. MiRNAs as molecular biomarkers in stage II egyptian colorectal cancer patients. *Exp. Mol. Pathol.* **2018**, *105*, 260–271, doi:10.1016/j.yexmp.2018.09.002. 499
377. Meneses, X.; Rios, R.; Huertas-Salgado, A.; Serrano, M.L. Circulating miR-141-3p, miR-143-3p and miR-200c-3p are differentially expressed in colorectal cancer and advanced adenomas. *Mol. Clin. Oncol.* **2019**, *11*, 201–207, doi:10.3892/mco.2019.1876. 500
378. Huang, G.; Wei, B.; Chen, Z.; Wang, J.; Zhao, L.; Peng, X.; Liu, K.; Lai, Y.; Ni, L. Identification of a four-microRNA panel in serum as promising biomarker for colorectal carcinoma detection. *Biomark. Med.* **2020**, *14*, 749–760, doi:10.2217/bmm-2019-0605. 501
379. Wang, J.; Yang, J.; Zhang, H.; Liao, Y.; Xu, D.; Ma, S. Effects of miR-135a-5p and miR-141 on proliferation, invasion and apoptosis of colorectal cancer SW620 cells. *Oncol. Lett.* **2020**, *20*, 914–920, doi:10.3892/ol.2020.11598. 502
380. Ding, L.; Yu, L.-L.; Han, N.; Zhang, B.-T. miR-141 promotes colon cancer cell proliferation by inhibiting MAP2K4. *Oncol. Lett.* **2017**, *13*, 1665–1671, doi:10.3892/ol.2017.5653. 503
381. Wu, P.P.; Zhu, H.Y.; Sun, X.F.; Chen, L.X.; Zhou, Q.; Chen, J. MicroRNA-141 regulates the tumour suppressor DLC1 in colorectal cancer. *Neoplasia* **2015**, *62*, 705–712, doi:10.4149/neo\_2015\_084. 504
382. Feng, L.; Ma, H.; Chang, L.; Zhou, X.; Wang, N.; Zhao, L.; Zuo, J.; Wang, Y.; Han, J.; Wang, G. Role of microRNA-141 in colorectal cancer with lymph node metastasis. *Exp. Ther. Med.* **2016**, *12*, 3405–3410, doi:10.3892/etm.2016.3751. 505
383. Peng, Z.; Zhu, W.; Dai, J.; Ju, F. MicroRNA-200 as potential diagnostic markers for colorectal cancer: Meta-analysis and experimental validation. *Cell. Mol. Biol.* **2018**, *64*, 77–85, doi:10.14715/cmb/2018.64.6.14. 506
384. Chen, L.; Gao, H.; Liang, J.; Qiao, J.; Duan, J.; Shi, H.; Zhen, T.; Li, H.; Zhang, F.; Zhu, Z.; et al. miR-203a-3p promotes colorectal cancer proliferation and migration by targeting PDE4D. *Am. J. Cancer Res.* **2018**, *8*, 2387–2401. 507
385. To, K.K.; Leung, W.W.; Ng, S.S. A novel miR-203-DNMT3b-ABCG2 regulatory pathway predisposing colorectal cancer development. *Mol. Carcinog.* **2016**, *56*, 464–477, doi:10.1002/mc.22508. 508
386. Fu, Q.; Zhang, J.; Xu, X.; Qian, F.; Feng, K.; Ma, J. miR-203 is a predictive biomarker for colorectal cancer and its expression is associated with BIRC5. *Tumor Biol.* **2016**, *37*, 15989–15995, doi:10.1007/s13277-016-5438-7. 509
387. Liu, Y.; Gao, S.; Chen, X.; Liu, M.; Mao, C.; Fang, X. Overexpression of miR-203 sensitizes paclitaxel (Taxol)-resistant colorectal cancer cells through targeting the salt-inducible kinase 2 (SIK2). *Tumor Biol.* **2016**, *37*, 12231–12239, doi:10.1007/s13277-016-5066-2. 510
388. Wang, Y.-N.; Chen, Z.-H.; Chen, W.-C. Novel circulating microRNAs expression profile in colon cancer: A pilot study. *Eur. J. Med. Res.* **2017**, *22*, 1–11, doi:10.1186/s40001-017-0294-5. 511
389. Orosz, E.; Kiss, I.; Gyöngyi, Z.; Varjas, T. Expression of Circulating miR-155, miR-21, miR-221, miR-30a, miR-34a and miR-29a: Comparison of Colonic and Rectal Cancer. *Vivo* **2018**, *32*, 1333–1337, doi:10.21873/in vivo.11383. 512
390. Farace, C.; Pisano, A.; Griñan-Lison, C.; Solinas, G.; Jiménez, G.; Serra, M.; Carrillo, E.; Scognamiglio, F.; Attene, F.; Montella, A.; et al. Deregulation of cancer-stem-cell-associated miRNAs in tissues and sera of colorectal cancer patients. *Oncotarget* **2020**, *11*, 116–130, doi:10.18632/oncotarget.27411. 513
391. Yong, F.L.; Law, C.W.; Wang, C.W. Potentiality of a triple microRNA classifier: miR-193a-3p, miR-23a and miR-338-5p for early detection of colorectal cancer. *BMC Cancer* **2013**, *13*, 280, doi:10.1186/1471-2407-13-280. 514
392. Yong, F.L.; Wang, C.W.; Roslani, A.C.; Law, C.W. The Involvement of miR-23a/APAF1 Regulation Axis in Colorectal Cancer. *Int. J. Mol. Sci.* **2014**, *15*, 11713–11729, doi:10.3390/ijms150711713. 515
393. Tang, X.; Yang, M.; Wang, Z.; Wu, X.; Wang, D. MicroRNA-23a promotes colorectal cancer cell migration and proliferation by targeting at MARK1. *Acta Biochim. Biophys. Sin.* **2019**, *51*, 661–668, doi:10.1093/abbs/gmz047. 516
394. Jin, F.; Yang, R.; Wei, Y.; Wang, D.; Zhu, Y.; Wang, X.; Lu, Y.; Wang, Y.; Zen, K.; Li, L. HIF-1 $\alpha$ -induced miR-23a~27a~24 cluster promotes colorectal cancer progression via reprogramming metabolism. *Cancer Lett.* **2019**, *440–441*, 211–222, doi:10.1016/j.canlet.2018.10.025. 517
395. Qin, D.; Wei, R.; Liu, S.; Zhu, S.; Zhang, S.; Min, L. A Circulating miRNA-Based Scoring System Established by WGCNA to Predict Colon Cancer. *Anal. Cell. Pathol.* **2019**, *2019*, 1–7, doi:10.1155/2019/1571045. 518

396. Maqbool, R.; Lone, S.N.; Hussain, M.U. Post-transcriptional regulation of the tumor suppressor p53 by a novel miR-27a, with implications during hypoxia and tumorigenesis. *Biochem. J.* **2016**, *473*, 3597–3610, doi:10.1042/bcj20160359.
397. Tan, Y.; Lin, J.-J.; Yang, X.; Gou, D.-M.; Fu, L.; Li, F.-R.; Yu, X.-F. A panel of three plasma microRNAs for colorectal cancer diagnosis. *Cancer Epidemiol.* **2019**, *60*, 67–76, doi:10.1016/j.canep.2019.01.015.
398. He, H.; Wang, N.; Yi, X.; Tang, C.; Wang, D. Low-level serum miR-24-2 is associated with the progression of colorectal cancer. *Cancer Biomark.* **2018**, *21*, 261–267, doi:10.3233/cbm-170321.
399. Hao, J.-P.; Ma, A. The ratio of miR-21/miR-24 as a promising diagnostic and poor prognosis biomarker in colorectal cancer. *Eur. Rev. Med. Pharmacol. Sci.* **2018**, *22*, 8649–8656.
400. Fang, Z.; Tang, J.; Bai, Y.; Lin, H.; You, H.; Jin, H.; Lin, L.; You, P.; Li, J.; Dai, Z.; et al. Plasma levels of microRNA-24, microRNA-320a, and microRNA-423-5p are potential biomarkers for colorectal carcinoma. *J. Exp. Clin. Cancer Res.* **2015**, *34*, 1–10, doi:10.1186/s13046-015-0198-6.
401. Wang, B.; Li, W.; Liu, H.; Yang, L.; Liao, Q.; Cui, S.; Wang, H.; Zhao, L. miR-29b suppresses tumor growth and metastasis in colorectal cancer via downregulating Tiam1 expression and inhibiting epithelial–mesenchymal transition. *Cell Death Dis.* **2014**, *5*, e1335, doi:10.1038/cddis.2014.304.
402. Basati, G.; Razavi, A.E.; Pakzad, I.; Malayeri, F.A. Circulating levels of the miRNAs, miR-194, and miR-29b, as clinically useful biomarkers for colorectal cancer. *Tumor Biol.* **2015**, *37*, 1781–1788, doi:10.1007/s13277-015-3967-0.
403. He, P.Y.; Yip, W.K.; Chai, B.; Jabar, M.F.; Dusa, N.; Mohtarrudin, N.; Seow, H.F. Inhibition of cell migration and invasion by miR-29a/3p in a colorectal cancer cell line through suppression of CDC42BPA mRNA expression. *Oncol. Rep.* **2017**, *38*, 3554–3566, doi:10.3892/or.2017.6037.
404. Zheng, Z.; Cui, H.; Wang, Y.; Yao, W. Downregulation of RPS15A by miR-29a-3p attenuates cell proliferation in colorectal carcinoma. *Biosci. Biotechnol. Biochem.* **2019**, *83*, 2057–2064, doi:10.1080/09168451.2019.1637712.
405. Yamada, A.; Horimatsu, T.; Okugawa, Y.; Nishida, N.; Honjo, H.; Ida, H.; Kou, T.; Kusaka, T.; Sasaki, Y.; Yagi, M.; et al. Serum miR-21, miR-29a, and miR-125b Are Promising Biomarkers for the Early Detection of Colorectal Neoplasia. *Clin. Cancer Res.* **2015**, *21*, 4234–4242, doi:10.1158/1078-0432.ccr-14-2793.
406. Yi, R.; Li, Y.; Wang, F.; Gu, J.; Isaji, T.; Li, J.; Qi, R.; Zhu, X.; Zhao, Y. Transforming growth factor (TGF)  $\beta$ 1 acted through miR-130b to increase integrin  $\alpha$ 5 to promote migration of colorectal cancer cells. *Tumor Biol.* **2016**, *37*, 10763–10773, doi:10.1007/s13277-016-4965-6.
407. Fassan, M.; Cui, R.; Gasparini, P.; Mescoli, C.; Guzzardo, V.; Vicentini, C.; Munari, G.; Loupakakis, F.; Lonardi, S.; Braconi, C.; et al. miR-224 Is Significantly Upregulated and Targets Caspase-3 and Caspase-7 During Colorectal Carcinogenesis. *Transl. Oncol.* **2019**, *12*, 282–291, doi:10.1016/j.tranon.2018.10.013.
408. Angius, A.; Uva, P.; Pira, G.; Muroi, M.R.; Sotgiu, G.; Sadari, L.; Uleri, E.; Caocci, M.; Ibba, G.; Cesaraccio, M.R.; et al. Integrated Analysis of miRNA and mRNA Endorses a Twenty miRNAs Signature for Colorectal Carcinoma. *Int. J. Mol. Sci.* **2019**, *20*, 4067, doi:10.3390/ijms20164067.
409. Liao, W.-T.; Li, T.-T.; Wang, Z.-G.; Wang, S.-Y.; He, M.-R.; Ye, Y.-P.; Qi, L.; Cui, Y.-M.; Wu, P.; Jiao, H.-L.; et al. microRNA-224 Promotes Cell Proliferation and Tumor Growth in Human Colorectal Cancer by Repressing PHLPP1 and PHLPP2. *Clin. Cancer Res.* **2013**, *19*, 4662–4672, doi:10.1158/1078-0432.ccr-13-0244.
410. Ke, T.-W.; Hsu, H.-L.; Wu, Y.-H.; Chen, W.T.-L.; Cheng, Y.-W.; Cheng, C.-W. MicroRNA-224 Suppresses Colorectal Cancer Cell Migration by Targeting Cdc42. *Dis. Markers* **2014**, *2014*, 1–11, doi:10.1155/2014/617150.
411. Feng, B.; Dong, T.T.; Wang, L.L.; Zhou, H.M.; Zhao, H.C.; Dong, F.; Zheng, M.H. Colorectal Cancer Migration and Invasion Initiated by microRNA-106a. *PLoS ONE* **2012**, *7*, e43452, doi:10.1371/journal.pone.0043452.
412. Lai, H.; Zhang, J.; Zuo, H.; Liu, H.; Xu, J.; Feng, Y.; Lin, Y.; Mo, X. Overexpression of miR-17 is correlated with liver metastasis in colorectal cancer. *Med.* **2020**, *99*, e19265, doi:10.1097/md.00000000000019265.
413. Kim, T.W.; Lee, Y.S.; Yun, N.H.; Shin, C.H.; Hong, H.K.; Kim, H.H.; Cho, Y.B. MicroRNA-17-5p regulates EMT by targeting vimentin in colorectal cancer. *Br. J. Cancer* **2020**, *123*, 1–8, doi:10.1038/s41416-020-0940-5.
414. Wikberg, M.L.; Myte, R.; Palmqvist, R.; Van Guelpen, B.; Ljuslinder, I. Plasma miRNA can detect colorectal cancer, but how early? *Cancer Med.* **2018**, *7*, 1697–1705, doi:10.1002/cam4.1398.
415. Cheng, D.; Zhao, S.; Tang, H.; Zhang, D.; Sun, H.; Yu, F.; Jiang, W.; Yue, B.; Wang, J.; Zhang, M.; et al. MicroRNA-20a-5p promotes colorectal cancer invasion and metastasis by downregulating Smad4. *Oncotarget* **2016**, *7*, 45199–45213, doi:10.18632/oncotarget.9900.
416. Zhang, G.; Zhou, H.; Xiao, H.; Liu, Z.; Tian, H.; Zhou, T. MicroRNA-92a Functions as an Oncogene in Colorectal Cancer by Targeting PTEN. *Dig. Dis. Sci.* **2014**, *59*, 98–107, doi:10.1007/s10620-013-2858-8.
417. Qin, S.; Zhu, Y.; Ai, F.; Li, Y.; Bai, B.; Yao, W.; Dong, L. MicroRNA-191 correlates with poor prognosis of colorectal carcinoma and plays multiple roles by targeting tissue inhibitor of metalloprotease *Neoplasma* **2014**, *61*, 27–34, doi:10.4149/neo\_2014\_005.
418. Lu, Y.-X.; Yuan, L.; Xue, X.-L.; Zhou, M.; Liu, Y.; Zhang, C.; Li, J.-P.; Zheng, L.; Hong, M.; Li, X.-N. Regulation of Colorectal Carcinoma Stemness, Growth, and Metastasis by an miR-200c-Sox2–Negative Feedback Loop Mechanism. *Clin. Cancer Res.* **2014**, *20*, 2631–2642, doi:10.1158/1078-0432.ccr-13-2348.
419. Muto, Y.; Suzuki, K.; Kato, T.; Tsujinaka, S.; Ichida, K.; Takayama, Y.; Fukui, T.; Kakizawa, N.; Watanabe, F.; Saito, M.; et al. Heterogeneous expression of zinc-finger E-box-binding homeobox 1 plays a pivotal role in metastasis via regulation of miR-200c in epithelial–mesenchymal transition. *Int. J. Oncol.* **2016**, *49*, 1057–1067, doi:10.3892/ijo.2016.3583.
420. Zhang, W.-W.; Ming, X.-L.; Rong, Y.; Huang, C.-Q.; Weng, H.; Chen, H.; Bian, J.-M.; Wang, F.-B. Diagnostic Value Investigation and Bioinformatics Analysis of miR-31 in Patients with Lymph Node Metastasis of Colorectal Cancer. *Anal. Cell. Pathol.* **2019**, *2019*, 1–10, doi:10.1155/2019/9740475.

421. Yin, J.; Bai, Z.-G.; Song, J.; Yang, Y.; Wang, J.; Han, W.; Zhang, J.; Meng, H.; Ma, X.; Yang, Y.; et al. Differential expression of serum miR-126, miR-141 and miR-21 as novel biomarkers for early detection of liver metastasis in colorectal cancer. *Chin. J. Cancer Res.* **2014**, *26*, 95–103, doi:10.3978/j.issn.1000-9604.2014.02.07. 615
422. Miao, J.; Hou, N.; Yang, W.; Jiang, Q.; Xue, W.; Wang, X.; Zhang, H.; Xiong, X.; Wang, L.; Zhao, L.; et al. miR-203a suppresses cell proliferation by targeting RING-finger protein 6 in colorectal cancer. *Anti-Cancer Drugs* **2020**, *31*, 583–591, doi:10.1097/cad.0000000000000874. 616
423. Cui, Q. Significance of miR-27a and miR-31 in early diagnosis and prognosis of colorectal cancer. *Oncol. Lett.* **2019**, *18*, 3092–3096, doi:10.3892/ol.2019.10621. 617
424. Faltejskova, P.; Bocanek, O.; Sachlova, M.; Svoboda, M.; Kiss, I.; Vyzula, R.; Slaby, O. Circulating miR-17-3p, miR-29a, miR-92a and miR-135b in serum: Evidence against their usage as biomarkers in colorectal cancer. *Cancer Biomark.* **2013**, *12*, 199–204, doi:10.3233/cbm-130308. 618
425. Wang, L.-G.; Gu, J. Serum microRNA-29a is a promising novel marker for early detection of colorectal liver metastasis. *Cancer Epidemiol.* **2012**, *36*, e61–e67, doi:10.1016/j.canep.2011.05.002. 619
426. Bi, D.-P.; Yin, C.-H.; Zhang, X.-Y.; Yang, N.-N.; Xu, J.-Y. miR-183 functions as an oncogene by targeting ABCA1 in colon cancer. *Oncol. Rep.* **2016**, *35*, 2873–2879, doi:10.3892/or.2016.4631. 620
427. Li, X.; Li, X.; Liao, D.; Wang, X.; Wu, Z.; Nie, J.; Bai, M.; Fu, X.; Mei, Q.; Han, W. Elevated microRNA-23a Expression Enhances the Chemoresistance of Colorectal Cancer Cells with Microsatellite Instability to 5-Fluorouracil by Directly Targeting ABCF1. *Curr. Protein Pept. Sci.* **2015**, *16*, 301–309, doi:10.2174/138920371604150429153309. 621
428. Pichler, M.; Stiegelbauer, V.; Vychytilova-Faltejskova, P.; Ivan, C.; Ling, H.; Winter, E.; Zhang, X.; Goblirsch, M.; Wulf-Goldenberg, A.; Ohtsuka, M.; et al. Genome-Wide miRNA Analysis Identifies miR-188-3p as a Novel Prognostic Marker and Molecular Factor Involved in Colorectal Carcinogenesis. *Clin. Cancer Res.* **2016**, *23*, 1323–1333, doi:10.1158/1078-0432.CCR-16-0497. 622
429. Li, J.; Chen, Y.; Zhao, J.; Kong, F.; Zhang, Y. miR-203 reverses chemoresistance in p53-mutated colon cancer cells through downregulation of Akt2 expression. *Cancer Lett.* **2011**, *304*, 52–59, doi:10.1016/j.canlet.2011.02.003. 623
430. Zhou, J.; Wang, J.; Wu, S.; Zhu, S.; Wang, S.; Zhou, H.; Tian, X.; Tang, N.; Nie, S. Angiopoietin-like protein 2 negatively regulated by microRNA-25 contributes to the malignant progression of colorectal cancer. *Int. J. Mol. Med.* **2014**, *34*, 1286–1292, doi:10.3892/ijmm.2014.1909. 624
431. Zhang, H.; Du, W.B.; Guo, X.M.; Wang, L.K.; Cheng, J.M.; Wei, L.J. Identification of the AQP8-miR-92a network associated with the aggressive traits of colorectal cancer. *Biochem. Biophys. Res. Commun.* **2020**, *527*, 218–225, doi:10.1016/j.bbrc.2020.04.055. 625
432. Zhai, Z.; Wu, F.; Chuang, A.Y.; Kwon, J.H. miR-106b Fine Tunes ATG16L1 Expression and Autophagic Activity in Intestinal Epithelial HCT116 Cells. *Inflamm. Bowel Dis.* **2013**, *19*, 2295–2301, doi:10.1097/mib.0b013e31829e71cf. 626
433. Che, J.; Wang, W.; Huang, Y.; Zhang, L.; Zhao, J.; Zhang, P.; Yuan, X. miR-20a inhibits hypoxia-induced autophagy by targeting ATG5/FIP200 in colorectal cancer. *Mol. Carcinog.* **2019**, *58*, 1234–1247, doi:10.1002/mc.23006. 627
434. Tsuchida, A.; Ohno, S.; Wu, W.; Borjigin, N.; Fujita, K.; Aoki, T.; Ueda, S.; Takanashi, M.; Kuroda, M. miR-92 is a key oncogenic component of the miR-17-92 cluster in colon cancer. *Cancer Sci.* **2011**, *102*, 2264–2271, doi:10.1111/j.1349-7006.2011.02081.x. 628
435. Subramanian, M.; Rao, S.R.; Thacker, P.; Chatterjee, S.; Karunakaran, D. MiR-29b downregulates canonical Wnt signaling by targeting BCL9L and other coactivators of  $\beta$ -catenin in human colorectal cancer cells. *J. Cell. Biochem.* **2014**, *115*, 1974–1984, doi:10.1002/jcb.24869. 629
436. Chai, H.; Liu, M.; Tian, R.; Li, X.; Tang, H. miR-20a targets BNIP2 and contributes chemotherapeutic resistance in colorectal adenocarcinoma SW480 and SW620 cell lines. *Acta Biochim. et Biophys. Sin.* **2011**, *43*, 217–225, doi:10.1093/abbs/gmq125. 630
437. Su, C.; Huang, D.; Liu, J.; Liu, W.; Cao, Y. miR-27a-3p regulates proliferation and apoptosis of colon cancer cells by potentially targeting BTG1. *Oncol. Lett.* **2019**, *18*, 2825–2834, doi:10.3892/ol.2019.10629. 631
438. Colangelo, T.; Polcaro, G.; Ziccardi, P.; Pucci, B.; Muccillo, L.; Galgani, M.; Fucci, A.; Milone, M.R.; Budillon, A.; Santopalo, M.; et al. Proteomic screening identifies calreticulin as a miR-27a direct target repressing MHC class I cell surface exposure in colorectal cancer. *Cell Death Dis.* **2016**, *7*, e2120, doi:10.1038/cddis.2016.28. 632
439. Humphreys, K.J.; Cobiac, L.; Le Leu, R.K.; Van der Hoek, M.B.; Michael, M.Z. Histone deacetylase inhibition in colorectal cancer cells reveals competing roles for members of the oncogenic miR-17-92 cluster. *Mol. Carcinog.* **2013**, *52*, 459–474, doi:10.1002/mc.21879. 633
440. Mencia, N.; Selga, E.; Noe, V.; Ciudad, C.J. Underexpression of miR-224 in methotrexate resistant human colon cancer cells. *Biochem. Pharmacol.* **2011**, *82*, 1572–1582, doi:10.1016/j.bcp.2011.08.009. 634
441. Zhang, H.; Guo, J.; Mao, L.; Li, Q.; Guo, M.; Mu, T.; Zhang, Q.; Bi, X. Up-regulation of miR-24-1-5p is involved in the chemoprevention of colorectal cancer by black raspberry anthocyanins. *Br. J. Nutr.* **2018**, *122*, 518–526, doi:10.1017/s0007114518003136. 635
442. Liu, D.; Zhang, H.; Cui, M.; Chen, C.; Feng, Y. Hsa-miR-425-5p promotes tumor growth and metastasis by activating the CTNND1-mediated  $\beta$ -catenin pathway and EMT in colorectal cancer. *Cell Cycle* **2020**, *19*, 1917–1927, doi:10.1080/15384101.2020.1783058. 636
443. Signs, S.A.; Fisher, R.C.; Tran, U.; Chakrabarti, S.; Sarvestani, S.K.; Xiang, S.; Liska, D.; Roche, V.; Lai, W.; Gittleman, H.R.; et al. Stromal miR-20a controls paracrine CXCL8 secretion in colitis and colon cancer. *Oncotarget* **2018**, *9*, 13048–13059, doi:10.18632/oncotarget.24495. 637
444. Mishra, P.J.; Song, B.; Mishra, P.J.; Wang, Y.; Humeniuk, R.; Banerjee, D.; Merlino, G.; Ju, J.; Bertino, J.R. MiR-24 Tumor Suppressor Activity Is Regulated Independent of p53 and through a Target Site Polymorphism. *PLoS ONE* **2009**, *4*, e8445, doi:10.1371/journal.pone.0008445. 638

445. Zhang, Q.; Li, W.; Liu, G.; Tang, W. MicroRNA-24 regulates the growth and chemosensitivity of the human colorectal cancer cells by targeting RNA-binding protein DND1. *J. B.U.ON* **2019**, *24*, 1476–1481. 676
446. Yu, C.; Sun, J.; Leng, X.; Yang, J. Long noncoding RNA SNHG6 functions as a competing endogenous RNA by sponging miR-181a-5p to regulate E2F5 expression in colorectal cancer. *Cancer Manag. Res.* **2019**, *11*, 611–624, doi:10.2147/cmar.s182719. 678
447. Xing, Y.; Jing, H.; Zhang, Y.; Suo, J.; Qian, M. MicroRNA-141-3p affected proliferation, chemosensitivity, migration and invasion of colorectal cancer cells by targeting EGFR. *Int. J. Biochem. Cell Biol.* **2020**, *118*, 105643, doi:10.1016/j.biocel.2019.105643. 680
448. Li, L.; Sarver, A.L.; Khatri, R.; Hajeri, P.B.; Kamenev, I.; French, A.J.; Thibodeau, S.N.; Steer, C.J.; Subramanian, S. Sequential expression of miR-182 and miR-503 cooperatively targets FBXW7, contributing to the malignant transformation of colon adenoma to adenocarcinoma. *J. Pathol.* **2014**, *234*, 488–501, doi:10.1002/path.4407. 682
449. Zhang, Y.; Wang, X.; Wang, Z.; Tang, H.; Fan, H.; Guo, Q. miR-182 promotes cell growth and invasion by targeting forkhead box F2 transcription factor in colorectal cancer. *Oncol. Rep.* **2015**, *33*, 2592–2598, doi:10.3892/or.2015.3833. 685
450. Qiang, Y.; Feng, L.; Wang, G.; Liu, J.; Zhang, J.; Xiang, L.; Su, C.; Zhang, S.; Xie, X.; Chen, E. miR-20a/Foxj2 Axis Mediates Growth and Metastasis of Colorectal Cancer Cells as Identified by Integrated Analysis. *Med. Sci. Monit.* **2020**, *26*, e923559, doi:10.12659/msm.923559. 687
451. Liu, Z.; Qin, Y.; Dong, S.; Chen, X.; Huo, Z.; Zhen, Z. Overexpression of miR-106a enhances oxaliplatin sensitivity of colorectal cancer through regulation of FOXQ1. *Oncol. Lett.* **2019**, *19*, 663–670, doi:10.3892/ol.2019.11151. 689
452. Longqiu, Y.; Pengcheng, L.; Xuejie, F.; Peng, Z. A miRNA s panel promotes the proliferation and invasion of colorectal cancer cells by targeting GABBR. *Cancer Med.* **2016**, *5*, 2022–2031, doi:10.1002/cam4.760. 692
453. Lai, H.; Tseng, W.; Huang, S.; Chao, T.; Su, Y. MicroRNA-203 diminishes the stemness of human colon cancer cells by suppressing GATA6 expression. *J. Cell. Physiol.* **2020**, *235*, 2866–2880, doi:10.1002/jcp.29192. 694
454. Hu, M.; Xia, M.; Chen, X.; Lin, Z.; Xu, Y.; Ma, Y.; Su, L. MicroRNA-141 Regulates Smad Interacting Protein 1 (SIP1) and Inhibits Migration and Invasion of Colorectal Cancer Cells. *Dig. Dis. Sci.* **2009**, *55*, 2365–2372, doi:10.1007/s10620-009-1008-9. 696
455. Fujiya, M.; Konishi, H.; Kamel, M.K.M.; Ueno, N.T.; Inaba, Y.; Moriichi, K.; Tanabe, H.; Ikuta, K.; Ohtake, T.; Kohgo, Y. miR-18a induces apoptosis in colon cancer cells via the autophagolysosomal degradation of oncogenic heterogeneous nuclear ribonucleoprotein A1. *Oncogene* **2014**, *33*, 4847–4856, doi:10.1038/onc.2013.429. 698
456. Zhao, Y.; Miao, G.; Li, Y.; Isaji, T.; Gu, J.; Li, J.; Qi, R. MicroRNA 130b Suppresses Migration and Invasion of Colorectal Cancer Cells through Downregulation of Integrin  $\beta$ . *PLoS ONE* **2014**, *9*, e87938, doi:10.1371/journal.pone.0087938. 701
457. Wang, Z.-Z.; Yang, J.; Jiang, B.-H.; Di, J.-B.; Gao, P.; Peng, L.; Su, X.-Q. KIF14 promotes cell proliferation via activation of Akt and is directly targeted by miR-200c in colorectal cancer. *Int. J. Oncol.* **2018**, *53*, 1939–1952, doi:10.3892/ijo.2018.4546. 703
458. Sells, E.; Pandey, R.; Chen, H.; Skovan, B.A.; Cui, H.; Ignatenko, N.A. Specific microRNA-mRNA Regulatory Network of Colon Cancer Invasion Mediated by Tissue Kallikrein-Related Peptidase 6. *Neoplasia* **2017**, *19*, 396–411, doi:10.1016/j.neo.2017.02.003. 705
459. Zhang, L.; He, L.; Zhang, H.; Chen, Y. Knockdown of MiR-20a Enhances Sensitivity of Colorectal Cancer Cells to Cisplatin by Increasing ASK1 Expression. *Cell. Physiol. Biochem.* **2018**, *47*, 1432–1441, doi:10.1159/000490834. 708
460. Wang, F.; Zhao, L.; Zhang, J.; Meng, Z.; Zhou, C.; Wang, G.; Liu, Y.; Li, M.; Xi, J.; Niu, W.; et al. Chemotherapy-induced miR-141/MAP4K4 signaling suppresses progression of colorectal cancer. *Biosci. Rep.* **2018**, *38*, doi:10.1042/bsr20180978. 710
461. Tang, S.; Fu, H.; Xu, Q.; Zhou, Y. miR-20a regulates sensitivity of colorectal cancer cells to NK cells by targeting MICA. *Biosci. Rep.* **2019**, *39*, doi:10.1042/bsr20180695. 712
462. Li, Y.; Kusc, C.; Banach, A.; Zhang, Q.; Pulkoski-Gross, A.; Kim, D.; Liu, J.; Roth, E.; Li, E.; Shroyer, K.R.; et al. miR-181a-5p Inhibits Cancer Cell Migration and Angiogenesis via Downregulation of Matrix Metalloproteinase-14. *Cancer Res.* **2015**, *75*, 2674–2685, doi:10.1158/0008-5472.can-14-2875. 714
463. Jung, J.H.; Shin, E.A.; Kim, J.-H.; Sim, D.Y.; Lee, H.; Park, J.E.; Lee, H.-J.; Kim, S.-H. NEDD9 Inhibition by miR-25-5p Activation Is Critically Involved in Co-Treatment of Melatonin- and Pterostilbene-Induced Apoptosis in Colorectal Cancer Cells. *Cancers* **2019**, *11*, 1684, doi:10.3390/cancers11111684. 717
464. Han, R.; Sun, Q.; Wu, J.; Zheng, P.; Zhao, G. Sodium Butyrate Upregulates miR-203 Expression to Exert Anti-Proliferation Effect on Colorectal Cancer Cells. *Cell. Physiol. Biochem.* **2016**, *39*, 1919–1929, doi:10.1159/000447889. 720
465. Alcantara, K.M.M.; Garcia, R.L. MicroRNA-92a promotes cell proliferation, migration and survival by directly targeting the tumor suppressor gene NF2 in colorectal and lung cancer cells. *Oncol. Rep.* **2019**, *41*, 2103–2116, doi:10.3892/or.2019.7020. 722
466. Zhang, Y.; Hu, X.; Miao, X.; Zhu, K.; Cui, S.; Meng, Q.; Sun, J.; Wang, T. Micro RNA -425-5p regulates chemoresistance in colorectal cancer cells via regulation of Programmed Cell Death. *J. Cell. Mol. Med.* **2016**, *20*, 360–369, doi:10.1111/jcmm.12742. 724
467. Deng, Y.H.; Deng, Z.H.; Hao, H.; Wu, X.L.; Gao, H.; Tang, S.H.; Tang, H. MicroRNA-23a promotes colorectal cancer cell survival by targeting PDK4. *Exp. Cell Res.* **2018**, *373*, 171–179, doi:10.1016/j.yexcr.2018.10.010. 726
468. Huang, G.; Wu, X.; Li, S.; Xu, X.; Zhu, H.; Chen, X. The long noncoding RNA CASC2 functions as a competing endogenous RNA by sponging miR-18a in colorectal cancer. *Sci. Rep.* **2016**, *6*, 26524, doi:10.1038/srep26524. 728
469. Pan, X.; Feng, J.; Zhu, Z.; Yao, L.; Ma, S.; Hao, B.; Zhang, G. A positive feedback loop between miR-181b and STAT 3 that affects Warburg effect in colon cancer via regulating PIAS 3 expression. *J. Cell. Mol. Med.* **2018**, *22*, 5040–5049, doi:10.1111/jcmm.13786. 730
470. Shi, L.; Li, X.; Wu, Z.; Li, X.; Nie, J.; Guo, M.; Mei, Q.; Han, W. DNA methylation-mediated repression of miR-181a/135a/302c expression promotes the microsatellite-unstable colorectal cancer development and 5-FU resistance via targeting PLAG1. *J. Genet. Genom.* **2018**, *45*, 205–214, doi:10.1016/j.jgg.2018.04.003. 732
471. Ou, B.; Sun, H.; Zhao, J.; Xu, Z.; Liu, Y.; Feng, H.; Peng, Z. Polo-like kinase 3 inhibits glucose metabolism in colorectal cancer by targeting HSP90/STAT3/HK2 signaling. *J. Exp. Clin. Cancer Res.* **2019**, *38*, 1–12, doi:10.1186/s13046-019-1418-2. 735

472. Wang, H.; Cai, X.; Ma, L. Curcumin Modifies Epithelial–Mesenchymal Transition in Colorectal Cancer Through Regulation of miR-200c/EPM5. *Cancer Manag. Res.* **2020**, *12*, 9405–9415, doi:10.2147/cmar.s260129. 737
473. Zhang, S.; Zhang, Y.; Cheng, Q.; Ma, Z.; Gong, G.; Deng, Z.; Xu, K.; Wang, G.; Wei, Y.; Zou, X. Silencing protein kinase C  $\zeta$  by microRNA-25-5p activates AMPK signaling and inhibits colorectal cancer cell proliferation. *Oncotarget* **2017**, *8*, 65329–65338, doi:10.18632/oncotarget.18649. 738
474. Qin, Y.; Huo, Z.; Song, X.; Chen, X.; Tian, X.; Wang, X. miR-106a regulates cell proliferation and apoptosis of colon cancer cells through targeting the PTEN/PI3K/AKT signaling pathway. *Oncol. Lett.* **2017**, *15*, 3197–3201, doi:10.3892/ol.2017.7715. 739
475. Zhang, Y.; Liu, X.; Zhang, J.; Xu, Y.; Shao, J.; Hu, Y.; Shu, P.; Cheng, H. Inhibition of miR-19a partially reversed the resistance of colorectal cancer to oxaliplatin via PTEN/PI3K/AKT pathway. *Aging* **2020**, *12*, 5640–5650, doi:10.18632/aging.102929. 740
476. Yuan, L.-L.; Li, L.; Liu, J.-N.; Mei, J.; Lei, C.-J. Down-regulation of miR-29a facilitates apoptosis of colorectal carcinoma cell SW480 and suppresses its Paclitaxel resistance. *Eur. Rev. Med. Pharmacol. Sci.* **2018**, *22*, 5499–5507. 741
477. Iseki, Y.; Shibutani, M.; Maeda, K.; Nagahara, H.; Fukuoka, T.; Matsutani, S.; Hirakawa, K.; Ohira, M. MicroRNA-96 Promotes Tumor Invasion in Colorectal Cancer via RECK. *Anticancer. Res.* **2018**, *38*, 2031–2035, doi:10.21873/anticancer.12442. 742
478. Fan, L.; Wu, Y.; Wang, J.; He, J.; Han, X. Sevoflurane inhibits the migration and invasion of colorectal cancer cells through regulating ERK/MMP-9 pathway by up-regulating miR-203. *Eur. J. Pharmacol.* **2019**, *850*, 43–52, doi:10.1016/j.ejphar.2019.01.025. 743
479. Lee, Y.; Kim, S.J.; Choo, J.; Heo, G.; Yoo, J.-W.; Jung, Y.; Rhee, S.H.; Im, E. miR-23a-3p is a Key Regulator of IL-17C-Induced Tumor Angiogenesis in Colorectal Cancer. *Cells* **2020**, *9*, 1363, doi:10.3390/cells9061363. 744
480. Bao, Y.; Chen, Z.; Guo, Y.; Feng, Y.; Li, Z.; Han, W.; Wang, J.; Zhao, W.; Jiao, Y.; Li, K.; et al. Tumor Suppressor MicroRNA-27a in Colorectal Carcinogenesis and Progression by Targeting SGPP1 and Smad2. *PLoS ONE* **2014**, *9*, e105991, doi:10.1371/journal.pone.0105991. 745
481. Li, H.; Zhang, H.; Lu, G.; Li, Q.; Gu, J.; Song, Y.; Gao, S.; Ding, Y. Mechanism analysis of colorectal cancer according to the microRNA expression profile. *Oncol. Lett.* **2016**, *12*, 2329–2336, doi:10.3892/ol.2016.5027. 746
482. Wang, Z.; Yang, J.; Di, J.; Cui, M.; Xing, J.; Wu, F.; Wu, W.; Yang, H.; Zhang, C.; Yao, Z.; et al. Downregulated USP3 mRNA functions as a competitive endogenous RNA of SMAD4 by sponging miR-224 and promotes metastasis in colorectal cancer. *Sci. Rep.* **2017**, *7*, 4281, doi:10.1038/s41598-017-04368-3. 747
483. Chen, E.; Li, Q.; Wang, H.; Yang, F.; Min, L.; Yang, J. MiR-92a promotes tumorigenesis of colorectal cancer, a transcriptomic and functional based study. *Biomed. Pharmacother.* **2018**, *106*, 1370–1377, doi:10.1016/j.biopha.2018.07.098. 748
484. Sun, W.; Wang, X.; Li, J.; You, C.; Lu, P.; Feng, H.; Kong, Y.; Zhang, H.; Liu, Y.; Jiao, R.; et al. MicroRNA-181a promotes angiogenesis in colorectal cancer by targeting SRCIN1 to promote the SRC/VEGF signaling pathway. *Cell Death Dis.* **2018**, *9*, 1–13, doi:10.1038/s41419-018-0490-4. 749
485. Zhang, X.; Li, X.; Tan, F.; Yu, N.; Pei, H. STAT1 Inhibits MiR-181a Expression to Suppress Colorectal Cancer Cell Proliferation Through PTEN/Akt. *J. Cell. Biochem.* **2017**, *118*, 3435–3443, doi:10.1002/jcb.26000. 750
486. Yu, G.; Li, H.; Wang, X.; Wu, T.; Zhu, J.; Huang, S.; Wan, Y.; Tang, J. MicroRNA-19a targets tissue factor to inhibit colon cancer cells migration and invasion. *Mol. Cell. Biochem.* **2013**, *380*, 239–247, doi:10.1007/s11010-013-1679-6. 751
487. Cellura, D.; Pickard, K.; Quarantino, S.; Parker, H.; Strefford, J.; Thomas, G.; Mitter, R.; Mirnezami, A.; Peake, N. miR-19-Mediated Inhibition of Transglutaminase-2 Leads to Enhanced Invasion and Metastasis in Colorectal Cancer. *Mol. Cancer Res.* **2015**, *13*, 1095–1105, doi:10.1158/1541-7786.mcr-14-0466. 752
488. Liu, Y.; Liu, R.; Yang, F.; Cheng, R.; Chen, X.; Cui, S.; Gu, Y.; Sun, W.; You, C.; Liu, Z.; et al. miR-19a promotes colorectal cancer proliferation and migration by targeting TIA1. *Mol. Cancer* **2017**, *16*, 1–17, doi:10.1186/s12943-017-0625-8. 753
489. Mastropasqua, F.; Marzano, F.; Valletti, A.; Aiello, I.; Di Tullio, G.; Morgano, A.; Liuni, S.; Ranieri, E.; Guerrini, L.; Gasparre, G.; et al. TRIM8 restores p53 tumour suppressor function by blunting N-MYC activity in chemo-resistant tumours. *Mol. Cancer* **2017**, *16*, 1–16, doi:10.1186/s12943-017-0634-7. 754
490. Li, T.; Gao, F.; Zhang, X.-P. miR-203 enhances chemosensitivity to 5-fluorouracil by targeting thymidylate synthase in colorectal cancer. *Oncol. Rep.* **2014**, *33*, 607–614, doi:10.3892/or.2014.3646. 755
491. Park, S.-Y.; Kim, H.; Yoon, S.; Bae, J.A.; Choi, S.-Y.; Jung, Y.D.; Kim, K.K. KITENIN-targeting MicroRNA-124 Suppresses Colorectal Cancer Cell Motility and Tumorigenesis. *Mol. Ther.* **2014**, *22*, 1653–1664, doi:10.1038/mt.2014.105. 756
